# Supplementary material for: Heterogeneity and chemical reactivity of the remote troposphere defined by aircraft measurements – corrected
Source: Copernicus journal article supplement (doi:10.5194/acp-23-99-2023), 2023-01-04
Supplement: Supplementary file 1 [file acp-23-99-2023-supplement.pdf]

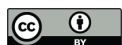

*Supplement of*

## **Heterogeneity and chemical reactivity of the remote troposphere defined by aircraft measurements – corrected**

**Hao Guo et al.**

*Correspondence to:* Hao Guo (haog2@uci.edu) and Michael J. Prather (mprather@uci.edu)

The copyright of individual parts of the supplement might differ from the article licence.

## S.1. The ATom Modeling Data Stream version 2b (MDS-2b)

The ATom mission was designed to collect a multi-species, detailed chemical climatology that documents the patterns of physical and chemical heterogeneity throughout the remote troposphere. The calculation of reactivities requires a complete set of key species in each air parcel to initialize chemistry models and then calculate the CH<sub>4</sub> and O<sub>3</sub> reactivities over a 24 h cycle. The ATom Modeling Data Stream (MDS) provides a semi-continuous set of 10 s air parcels with a full set of values for the key chemical reactants and conditions. This Supplementary Methods Section documents the methods used to create the MDS versions.

The original MDS version 0 used CO or other surrogates and correlations with CO to fill gaps. MDS-0 was distributed to 6 modeling groups who then calculated the mean reactivities and photolysis rates using the ATom protocol for 3D models (initialize a model grid cell nearest the observation with the ATom key species from the MDS, integrate for 24 h without transport or other physical connection between cells, average the reactivities over 5 days scattered 5-days apart throughout the mission). Reported reactivities are the 5-day averages. These first results are reported here because they allow for a cross-model comparison using the same MDS for initialization. After examining the statistics of the gap-filled parcels, we found that many MDS-0 species were poorly interpolated and the abundances of VOCs and NO<sub>x</sub> were sometimes exaggerated. We tried to correct these errors with MDS-1 and tested this version with the UCI and GMI models. Again, we found that the gap filling failed. Then we started on the formal and careful protocol MDS version 2 described here, which is transparent (flags describe how each datum point is determined). We calculated these reactivities with the UCI CTM only. Our first look at the reactivities showed that the Eastern Pacific was unusually reactive in ATom-1. We found that the MDS-2 method of long-gap filling for NO<sub>x</sub> resulted in propagation of high NO<sub>x</sub> levels from the over-land profiles into the over-water profiles in the tropics. We separated these two set of profiles used for long-gap NO<sub>x</sub> filling and created an updated version MDS-2b. This is the final version at the time of this paper.

ATom completed its four deployments: ATom-1 starting 20160729 (YYYYMMDD), ATom-2 starting 20170126, ATom-3 starting 20170928, and ATom-4 starting 20180424. ATom targets the remote troposphere by sampling over the middle of the Pacific and Atlantic Ocean basins. The DC-8 aircraft performed in situ profiling of the atmosphere from 0.2 km to 12 km along each flight segment as often as possible. Each deployment lasted about 4 weeks and contained 11 to 13 research flights (RF). Fig. S1 maps the 48 RF, and the Table S1 summarizes each flight in terms of airports, starting date (UT), and number of 10 s parcels. We also number all the research flights consecutively as ATom flights (AF) 1 through 48. The 10 s data starts with 149,133 parcels, but we collapse this to 146,494 parcels, avoiding near-airport pollution, to make MDS version 2b (MDS-2b) described here. AF 46 is a short ferry flight from Kangerlussuaq, Greenland to Bangor, Maine with many instruments turned off and no profiling, thus these 1,106 parcels contain only flight data (MDS variables 1:11) and no chemical data.

ATom sampling of the troposphere is more uniform than most aircraft missions, but still contains some biases that can be adjusted by weighting each air parcel. Due to the typical profiling sequence (level at cruising altitude for 10 min, descent for 20 min, level flight about 160 m above the sea level for 5 min, and a 20-min climb back to cruising altitude) and to the occasional requirements of weather or air traffic control, the sampling is skewed towards the uppermost troposphere ( $P < 300$  hPa) and, secondly, the marine boundary layer. For certain analyses such as probability densities (PDs) we recommend weighting each parcel inversely with the density of sampling (e.g., the number of parcels in a 10° latitude by 100 hPa pressure bin). These bins are used only for weighting each parcel and do not average the values. No parcel weights are

included in MDS-2. The ATom-1 analysis selects three study domains: Global includes all parcels (32,383) weighted as above; Pacific considers all measurements over the Pacific Ocean from 53 °S to 60 °N (research flights RF 1,3,4,5,6); and the Atlantic, likewise, from 53 °S to 60 °N (RF 7, 8, 9) over the Atlantic basin. The ATom-1 flight tracks shown in Fig. S1 identify the Pacific and Atlantic domains with very thick lines. Also shown are the regional blocks used to calculate the model climatologies for one day in mid-August over those domains.

We choose 10 s averages for our air parcels as a compromise to include most of the instruments, and because the 10 s merged data is a standard product (Wofsy et al., 2018). Some of our core species are measured with gas chromatographs or flask samples with longer integrations times (30-90 sec), but these can be mapped onto the 10 s parcels with loss of the higher frequency variability found in the 10 s measurements. The frequent profiling of the DC-8 gives us both vertical and horizontal scales: the vertical extent of a 10 s parcel is 50–110 m (55 %–95 % of all parcels, with < 50% having near level flight) and the horizontal extent is typically 1.4–2.5 km (10 %–90 % of all parcels). A few key species have 1 Hz measurements, and, as a case study, we examine the time series of O<sub>3</sub> and H<sub>2</sub>O measured during one of the profiles of ATom-1 RF 3 in Fig. S2. The 1 s data is plotted along with the 10 s averages. Most of the heterogeneity including correlated variability is caught with the 10 s parcels. For all of RF 3, the root mean square error (RMSE) of the 10 s averages linearly interpolated to 1 s is 6 % for H<sub>2</sub>O and 3 % for O<sub>3</sub>. The short-gap interpolation described below has an RMSE twice as large for these same species. A typical global model resolution is indicated in Fig. S2 by the vertical lines spaced at 500 m altitude intervals.

The challenge in creating the MDS is the merging of multiple measurements of the same species and filling gaps in the record. MDS includes the core reactive species (H<sub>2</sub>O, O<sub>3</sub>, CO, CH<sub>4</sub>, NO<sub>x</sub>, NO<sub>x</sub>PSS, HNO<sub>3</sub>, HNO<sub>4</sub>, PAN, CH<sub>2</sub>O, H<sub>2</sub>O<sub>2</sub>, CH<sub>3</sub>OOH, acetone, acetaldehyde, C<sub>2</sub>H<sub>6</sub>, C<sub>3</sub>H<sub>8</sub>, *i*-C<sub>4</sub>H<sub>10</sub>, *n*-C<sub>4</sub>H<sub>10</sub>, alkanes, C<sub>2</sub>H<sub>4</sub>, alkenes, C<sub>2</sub>H<sub>2</sub>, C<sub>5</sub>H<sub>8</sub>, benzene, toluene, xylene, CH<sub>3</sub>ONO<sub>2</sub>, C<sub>2</sub>H<sub>5</sub>ONO<sub>2</sub>, RONO<sub>2</sub>, CH<sub>3</sub>OH) and corollary species indicative of pollution or processing (HCN, CH<sub>3</sub>CN, SF<sub>6</sub>, relative humidity, aerosol surface area (4 modes), and cloud indicator), see Table S2. Every species in each air parcel is now flagged so that the instrument is clearly identified (in the case that two instruments measure the same species) and the type of the gap filling (dependent on the length of the gap) is denoted so that the users can develop their own criteria for including, or not including, the gap-filled species. Flags 1 & 2 indicate a reported measurement from a primary (1) or secondary (2) instrument. Flag 3 means short-gap filling. Flags 4 & 6 indicate log-gap filling for tropospheric and stratospheric parcels, respectively. Flag 5 applies to missing flights with no data from that instrument(s), and these were filled by a multiple linear regression from the parallel flights. Flag 0 indicates not a number (NaN), which only occurs for AF 46. Thus, while the MDS creates a continuous stream of fully speciated 10 s air parcels, the users can sub-select, for example, only the direct measurements from the primary instrument.

### S.1.1. The primary ATom data sets

The 'Mor' data sets created by Wofsy et al. (2018) contain merges of the ATom 10 s data (Mor.all), the WAS flask data analyzed post-flight (Mor.WAS.all) and the in-flight TOGA chromatograph-mass spectrometer data (Mor.TOGA.all). These data sets are released in a gzip file with the YYYY-MM-DD of their creation. For this MDS version (2020-05-27), we use the following 3 data sets:

'Mor.all.at1234.2020-05-27.tbl' (653,494,900 bytes)  
'Mor.WAS.all.at1234.2020-05-27.tbl' (49,091,169 bytes)  
'Mor.TOGA.all.at1234.2020-05-27.tbl' (80,579,206 bytes)

The Mor data are ASCII text files with extremely long records and difficult to read, containing a mix of comma-separated floating point, integer and character strings. For Mor.all, the 149133 records contain 675 comma-separated variables (but this can change with different releases). Some of the floating point variables are longer than 20 characters due to excess precision in the scientific notation. We pre-process these with a Fortran generic read(5,\*) using the comma separation to generate character strings. The code searches the title (first) record of the Mor...tbl to identify the specific columns that we need for MDS (in this case 39 out of 675). The 39 key data from each record are rewritten in formatted form (39a40, because some floating point variables were excessively long and 39a20 was inadequate) with comma separation. All numerical values are copied verbatim, but the text 'NA' is replaced by 'NaN'. This new file can be simply imported into Matlab or more easily read by other software. Further, this approach ensures that the correct quantities are pulled from the Mor...tbl file, even if the column order changes due to addition or removal of data. The WAS and TOGA observations have separate files with the start and end times of the observed air mass, which is greater than the 10s interval in the regular file. Both WAS & TOGA Mor...data sets have a large number of data columns (729 & 727) with fewer records (6,991 & 12,168, respectively).

The 3 Fortran output files are imported into Matlab (using 'Import Data') and then processed as described below. The instructions and Matlab code are included in text files containing Matlab commands: 'Pmat-Mor1.txt', 'Pmat-WAS+TOGA.txt', 'Pmat-MDS0n.txt').

### S.1.2. Preliminary processing and identifying gaps

In terms of critical flight data (time, latitude, longitude, altitude), there are no gaps in the record. UTC\_stop has a gap, but this variable is not used in the MDS (10s intervals are assumed).

The Mor.all.at1234.2020-05-27 data set of 149,133 10s parcels was sorted into deployments and research flights. The beginning and end points of each research flight (RF) along with the deployment and starting date of each flight are given in Table S1. All together there are 48 flights, but AF 46 contains only flight data. All three types of Mor data include some measurements close to the airports, which often have ground-level pollution. We remove these data by including only measurements at altitudes of 900 m or more above the takeoff/landing airport. The record collapses to 146,494 parcels, also shown in Table S1.

The list of MDS-2b variables, their MDS identifiers (all ending in \_M) and the sources in standard ATom nomenclature are given in Table S2. The flag variables (0 to 6) are also explained there. Information about each research flight is summarized in **Table S3abcd**, including the average latitude, longitude and altitude of the 10s parcels (all equally weighted here). The abcd sub-tables correspond to the 4 deployments. For each of the MDS variables 12 to 50, The % of non-NaN values with flags = 1, 2 or 3, is shown (the remaining % has flags = 4, 5 or 6). These data correspond to a primary or secondary direct measurement (1 or 2) or else short-gap interpolation (3, see text below). Missing data for an entire flight (0%) has shaded cells.

**Mor.all combined species and fixes.** The primary MDS NO<sub>x</sub> values were created by simply summing NO<sub>CL</sub> + NO<sub>2</sub><sub>CL</sub> before any attempt to deal with the negative values. The number (27071) of NO<sub>x</sub> NaNs coincides with those of NO<sub>2</sub><sub>CL</sub>. The alternative photostationary state NO<sub>x</sub> values (NO<sub>x</sub>PSS) were calculated from O<sub>3</sub>, NO and J-values and was originally proposed as a more accurate value for NO<sub>x</sub>. Subsequent analysis has shown this approach is biased, and it is included here only for ATom-1 because some early model studies used it in the MDS-0 version. A small number (22) of CH<sub>4</sub><sub>QCLS</sub> values have unrealistic abundances <1000 ppb and these are converted to NaNs. The NaNs in these cases were filled using the algorithm below.

**TOGA and WAS combined species and immediate fixes.** Methyl and ethyl nitrate (WAS only) are kept separately but the 6 higher organo-nitrates are combined into  $\text{RONO}_2$ ; the limited TOGA organo-nitrates are not used. For both WAS and TOGA, toluene and ethylbenzene are combined into toluene, and the two forms of xylene are combined. Both forms of butane are kept, but higher alkanes are combined into 'Alkanes' for both TOGA and WAS. TOGA and WAS use -888 flags for LLOD and these are converted to 0.001 ppt because the LLOD values for these species (e.g., 3 ppt) are much higher than remote background values and setting them to the LLOD level would be misleading. TOGA's toluene has some mistaken values of 888 and 999 instead of -888 and -999 and these are corrected. All -999 values, as well as all gaps in either TOGA or WAS measurement intervals are converted to NaNs. The WAS and TOGA data have time stamps (stop minus start) much longer than the 10 s parcels in the Mor.all data sets, and their values are mapped onto the 164,494 parcels whenever their start or stop time falls within the 10s start-stop range, else they are filled with NaNs. The WAS and TOGA instruments sample air averaged over typically 30 to 90 s, and then have a gap before the next measurement, varying from 30 to 300 s. The TOGA length-of-measurement is regular with the 10–90 percentile range being about 35 s and the same percentile length-of-gaps being about 85 s. The WAS data comes from flasks filled in flight, and the time to fill a flask depends on the pressure, and the gap depends on the operator decision: the 10%-90%ile length-of-measurement is 32 to 90 s, and the corresponding gaps are 33 to 285 s.

### S.1.3. Interpolation and fill of data gaps

The actions here are arbitrary but judicious, and every attempt was made to avoid introducing spurious data. There are a number of negative values for chemical variables that are intrinsically positive definite. Instrument reporting of a negative value is expected when the concentration is near the limit of detection or within the instrumental noise range. The MDS choice is simply to take all such values less than or equal to 0 and convert to 0.001 ppt. Since these negative values usually represent a small concentration close to the detection limit, they have little impact on the chemistry calculations using the MDS. If analyzing statistics near this range, the original Mor data sets should be used.

**Pressure and temperature.** P and T have 5 very small gaps of length ~6 (# of 10s parcels missing) plus a longer gap of length 28. All gaps occurred during smooth descent or ascent and so were filled using linear interpolation. These are denoted by  $\text{flag\_M}(:,10) = \text{flag\_M}(:,11) = 3$ . In this document we are careful to give measured species a suffix that denotes their provenance, and thus the MDS variables denoting the combined, continuous data are labeled P\_M and T\_M.

**H<sub>2</sub>O and relative humidity.** There are a number of short gaps in the record of H<sub>2</sub>O\_DLH and RHw\_DLH, and only 2 longer gaps (length = 83 and 87). One of the long gaps occurs during descent as H<sub>2</sub>O jumps from 240 to 18,000 ppm. Thus we choose a linear in the log method for all H<sub>2</sub>O gaps, while a simply linear method is used to fill RHw gaps. These are denoted by  $\text{flag\_M}(:,12) = \text{flag\_M}(:,13) = 3$ . The MDS variables denoting the combined data are H2O\_M and RHw\_M.

**CO.** In our first attempts to produce a gap-filled record for chemical modeling, we sought a species with continuous measurement that could be used as a proxy for unusual or polluted air during the gaps in other species. CO was the obvious species because it is indicative of biomass burning or industrial pollution, and ATom has two well calibrated, nearly continuous measurements: CO\_NOAA and CO\_QCLS. The primary CO data are from QCLS because it has higher precision and the secondary are from NOAA which has fewer gaps. Unfortunately, after

creating this gap-filled CO data and applying it as a proxy for MDS versions 0 and 1, we found that CO had little skill in filling the gaps in other species. We use this method to generate our CO\_M record for the MDS, but do not use it for other species. This processing of the CO data was done with the full 149,133-parcel dataset, and not the airport-collapsed data set. For the MDS-2b airport-truncated data set, CO\_NOAA has 8463 gaps; and CO\_QCLS has 30,233. Most all of these gaps are short and part of the instrument cycling.

1. Modify CO\_QCLS: interpolate short gaps in the CO\_QCLS record ( $\leq 10$  parcels = 100s ~ 1000 m vertically)
2. Create a continuous CO\_N record.
  - a. Start with CO\_NOAA and locate all the NaN gaps.
  - b. Fill gaps with modified CO\_QCLS where available and locate new NaN gaps.
  - c. Average CO for 5 points on either side of gap, interpolate linearly across the gaps.
3. Smooth the CO\_N record, which is visibly noisy at 10 s with 11-point running average (~ 1000 m in vertical).
4. Create a continuous CO record.
  - a. Define CO = modified CO\_QCLS (step 1).
  - b. Fill the gaps in CO with CO\_N (step 3).
  - c. Define CO flags:
    - 1 = primary, QCLS (116,261 parcels);
    - 2 = secondary, smoothed CO\_N (29428);
    - 3 = modified, short-interpolated QCLS (80);
    - 4 = interpolated CO\_N (725).

Two samples of this CO interpolation method are shown in Fig. S3. The frequency of occurrence of all flags for this new CO\_M variable, along with the other MDS chemical variables, are given in Table S4. About 99 % of the CO\_M records are from direct measurements (QCLS or NOAA), and this is matched only by the H<sub>2</sub>O and O<sub>3</sub> measurements.

**Short-gap simple interpolation for remaining species.** It was decided that the least intrusive method for filling short data gaps was to simply interpolate using only the instrument data. In MDS versions 0 and 1, CO was used as a proxy to fill these gaps, but later analysis showed little correlation with absolute CO or even the short-term variability in CO. We examined the typical size of gaps and their frequency. For the Mor.all species we selected gaps of  $\leq 13$  for short-gap interpolation; for WAS the gap frequency peaked about 10 (100 s) and we selected gaps of  $\leq 10$ ; for TOGA there was a strong peak at gap length of 7-8 (instrument cycle time) and we also selected  $\leq 10$  as the criterion. These gaps correspond to about 1000 m or less in the vertical during ascent or descent. For most Mor.all variables this adds about 10 % (absolute) to the number of non-NaN parcels, but for WAS and TOGA with many smaller gaps it greatly enhances the coverage. WAS coverage goes from 28 % to 41 %, while TOGA jumps from 31% to 93% because most gaps are 85 s. For all short-gap interpolation, the parcel data for that species is tagged with flag = 3.

**Long-gap interpolation for remaining species - Troposphere.** We choose a robust and minimally intrusive method for filling gaps  $> 10$  (100 s) based upon the average tropospheric profile for that flight, using eight 100-hPa-wide bins ( $< 300$ , 300–400, 400–500, 500–600, 600–700, 700–800, 800–900,  $> 900$  hPa). The gap value is replaced by the appropriate bin value. If any bins have no measured values, we use the nearest bin or average of the nearest bins. It is important not to confuse stratospheric and tropospheric air when gap filling. From our analysis, a number of key reactive species (e.g., CH<sub>2</sub>O, HOOH, NO<sub>x</sub>) show distinctly different patterns as ATom crosses into the stratosphere. This method had to be refined in version 2b, particularly for the first research flight of each deployment (Palmdale to the Equator and back along 121 °W).

We found high NO<sub>x</sub> values on the climb out of or into the Los Angeles basin were mapped onto the tropical ocean where the instrument dropped out for many profiles, especially in ATom-1. We created two separate average NO<sub>x</sub> profiles as described above: one for east of 121 °W and another for over the ocean. This special fix was only applied to NO<sub>x</sub> to create version 2b.

**Long-gap interpolation - Stratosphere.** We find the most robust definition of stratospheric-like air to be based primarily on H<sub>2</sub>O rather than O<sub>3</sub>, because O<sub>3</sub> abundances > 200 ppb are often seen in large, clearly tropospheric air masses with H<sub>2</sub>O > 50 ppm. Based on percentiles of O<sub>3</sub> at different values of H<sub>2</sub>O (see Fig. S4a) we pick <30 ppm as the criteria for being stratospheric, with the secondary requirements that O<sub>3</sub> > 80 ppb and CO < 120 ppb (see Fig. S4b). For the stratospheric air we create mean 'profiles' in terms of six O<sub>3</sub> bins (< 200, 200–300, 300–400, 400–500, 500–700, > 700 ppb) use this as a lookup table for gap filling. There are many fewer stratospheric parcels, and the stratosphere tends to be similar across latitudes, and so we create a single lookup tables from all research flights at all latitudes. In general, these near tropopause air parcels are cold and dry and not highly reactive; however when partitioning the chemistry model calculated reactivities between stratosphere and troposphere, these criteria may need to be re-investigated.

As a measure of the error in this long-gap interpolation, we randomly select 10% of the air parcels from data stream before calculating the long-gap interpolation, interpolate those 10% points, and calculate the mean bias and root-mean-square error (rmse). This is repeated 10 times and we show the average results in Table S5 below. We find these results acceptable, and better than the multiple linear regressions we tried. There may be a better way to do this in future versions MDS-2b, perhaps with a machine-learning approach. Gaps interpolated in this way are given flag = 4 (troposphere tables) and flag = 6 (stratosphere tables).

**Missing data for an entire flight.** For **ATom-1 RF-5**, an instrument failed and we lost all data for H<sub>2</sub>O<sub>2</sub>\_M, HNO<sub>3</sub>\_M, and HNO<sub>4</sub>\_M. This flight was from American Samoa to Christ Church. We fill these species using a multiple linear regression from the parallel flights ATom-1 RF-4 and ATom-2/3/4 RF-4/5. The independent (explanatory) variables for the multiple linear regression for these missing flights are chosen to be pressure, noontime solar zenith angle and latitude (in that order). For H<sub>2</sub>O<sub>2</sub>\_M and HNO<sub>3</sub>\_M, we calculate the missing ATom-1 RF-5 data using the full set of parallel flights, but for HNO<sub>4</sub>\_M, we can use only ATom-1/2 flights (see Table S3 & S6). Data filled for missing flights are given flag = 5. For **ATom-2 RF-2**, we also lost all data for H<sub>2</sub>O<sub>2</sub>\_M, HNO<sub>3</sub>\_M, and HNO<sub>4</sub>\_M. In this case the regression is based on parallel flights ATom-2 RF-3 and ATom-1/3/4 RF-2/3 for H<sub>2</sub>O<sub>2</sub>\_M and HNO<sub>3</sub>\_M, but only ATom-2 RF-3 and ATom-1 RF-2/3 for HNO<sub>4</sub>\_M. For **ATom-3 RF-1**, we lost all data for NO<sub>x</sub>\_M. A multiple linear regression is based on parallel flights ATom-3 RF-2 and ATom-1/2/4 RF-1/2. For **ATom-3/4 all**, we lost all data for HNO<sub>4</sub>\_M, and the best we can do is base the regression on all HNO<sub>4</sub>\_M measurements (not filled as noted above) from ATom-1/2. This is clearly one of the weakest gap filled here, and users should be careful if key results depend HNO<sub>4</sub>\_M values for ATom-3/4. For **ATom-4 RF-5/6/7/8/9/12/13**, we lost all data for CH<sub>3</sub>OOH\_M. A multiple linear regression approach was based on data from the preceding RF-4 as well as the parallel research flights from the other 3 deployments (i.e., ATom-1/2 RF-5 to 11, ATom-3 RF-5 to 13, ATom-4 RF-4). For **ATom-4 RF-11** (AF 46), all chemical data have flag = 0, value = NaN. A summary of the missing flights and species along with estimated error in our gap filling is given in Table S6.

From the reactivity results for ATom-1 shown in this paper, the lack of ATom-3 NO<sub>x</sub> observations in the Eastern Pacific (RF 1) mean that the P-O3 statistics there (not calculated in this paper) will not be useful.

#### S.1.4. Species measured by two instruments

Several species have redundant measurements and these are identified by the duplicate sources in Table S2. The choice of primary (flag = 1) and secondary (flag = 2) are chosen based on continuity of record or coverage of related species, or our estimate of the higher precision measurement. Primary data sources usually have a better data coverage.

**CH<sub>4</sub>:** (1) CH<sub>4</sub>\_NOAA, (2) CH<sub>4</sub>\_QCLS. The primary has more data and does not have spurious anomalies. There is no evident bias, but some scatter, and so the NaNs in the primary record (which first has had short-gap interpolation as noted above) are simply filled with the secondary record (also with short-gap interpolation).

**CH<sub>2</sub>O:** (1) CH<sub>2</sub>O\_ISAF, (2) CH<sub>2</sub>O\_TOGA. Formaldehyde is a key reactive species and TOGA provides a secondary record for the 2<sup>nd</sup> half of ATom-4 when ISAF failed. The overlapping data with both instruments is plotted in below (Fig. S5). The mean difference in overlapping observations is very small (-1 out of a mean of 134 ppt), but the rms is larger (75 ppt). ISAF has a number of values > 1000 ppt, while TOGA has none. A linear fit gives a slope of 0.8 with  $R^2 = 0.59$ , but a 1:1 slope has only slightly smaller  $R^2 = 0.55$ . We do not attempt to rescale the TOGA data in this case and just replace any NaNs remaining in the short-gap-interpolated ISAF record (particularly flights 42:48) with TOGA data (also short-gap interpolated).

**PAN:** (1) PAN\_GTCIMS, (2) PAN\_PECD\*. The GTCIMS joined the mission at ATom-2. The overlap period shows a clear bias between the GTCIMS and PECDD observations. A linear fit is clear ( $R^2 = 0.84$ ), and we rescale the secondary PECDD\* = (PECD + 0.45)/1.18.

**C<sub>3</sub>H<sub>8</sub>:** (1) Propane\_WAS, (2) Propane\_TOGA. No obvious bias is found. A linear fit gives an  $R^2 = 0.90$ , but the 1:1 line has an  $R^2 = 0.85$ , so we just use the TOGA data directly as the secondary observation.

***i*-C<sub>4</sub>H<sub>10</sub>:** (1) iButane\_WAS, (2) iButane\_TOGA. No obvious bias is found. A linear fit gives an  $R^2 = 0.955$ , but the 1:1 line has an  $R^2 = 0.947$ , so we just use the TOGA data directly as the secondary observation.

***n*-C<sub>4</sub>H<sub>10</sub>:** (1) nButane\_WAS, (2) nButane\_TOGA. No obvious bias is found. A linear fit gives an  $R^2 = 0.962$ , but the 1:1 line has an  $R^2 = 0.942$ , so we just use the TOGA data directly as the secondary observation.

**C<sub>5</sub>H<sub>8</sub>:** (1) Isoprene\_TOGA, (2) Isoprene\_WAS. No obvious bias is found. A linear fit gives an  $R^2 = 0.938$ , but the 1:1 line has an  $R^2 = 0.904$ , so we just use the WAS data directly as the secondary observation.

**benzene:** (1) Benzene\_TOGA, (2) Benzene\_WAS. There is some systematic difference between WAS and TOGA (TOGA = ~0.75 x WAS), but the contribution of WAS to the aromatics is small (see flag=2 is <3% in Table S4) and so we did not scale WAS.

**toluene:** (1) Toluene\_TOGA + EthBenzene\_TOGA, (2) Toluene\_WAS + EthBenzene\_WAS. No obvious bias is found in spite of the large scatter. A linear fit gives an  $R^2 = 0.75$ , but the 1:1 line has an  $R^2 = 0.74$ , so we just use the TOGA data directly as the secondary observation.



**xylene:** (1) mpXylene\_TOGA + oXylene\_TOGA, (2) mpXylene\_WAS + oXylene\_WAS. No obvious bias is found in spite of the very large scatter. A linear fit gives an  $R^2 = 0.3$ , so we just use the WAS data directly as the secondary observation.

**HCN:** (1) HCN\_CIT, (2) HCN\_TOGA. The CIT observation is chosen as primary because of its more continuous, 10s record. In spite of the large scatter, a linear fit with a slope of 0.8 does not greatly reduce the variance ( $R^2 = 0.74$  vs 0.65 for 1:1), so we just use the TOGA data directly as the secondary observation.

**SF6:** (1) SF6\_PECD, (2) SF6\_UCATS. The scatter seems large, but the relationship is mostly 1:1 with  $R^2 = 0.90$ . A linear fit gives a slope of 0.99, and so we just use the UCATS data directly as the secondary observation. Both data sets are sparse.

## **S.2. The Reactivity Data Stream**

In this paper, we use 6 global atmospheric chemistry models for their August chemical statistics. We use 5 of these models plus a box model to calculate the Reactivity Data Stream (RDS, i.e., chemical tendencies) for each ATom-1 MDS-0 10 s air parcel. The models are summarized in the main paper Table 1 and with more detail in Table S7 here. Statistics of the reactivities and J-values across models and MDS versions are shown in the main Table 2 and Tables S8abc here. Table S9 gives the standard deviation when averaging across 5 separated days in August (% of mean reactivity or J-value). See the main paper for a description of the RDS protocol used for MDS-0 and the updated RDS\* protocol used for MDS-2b.

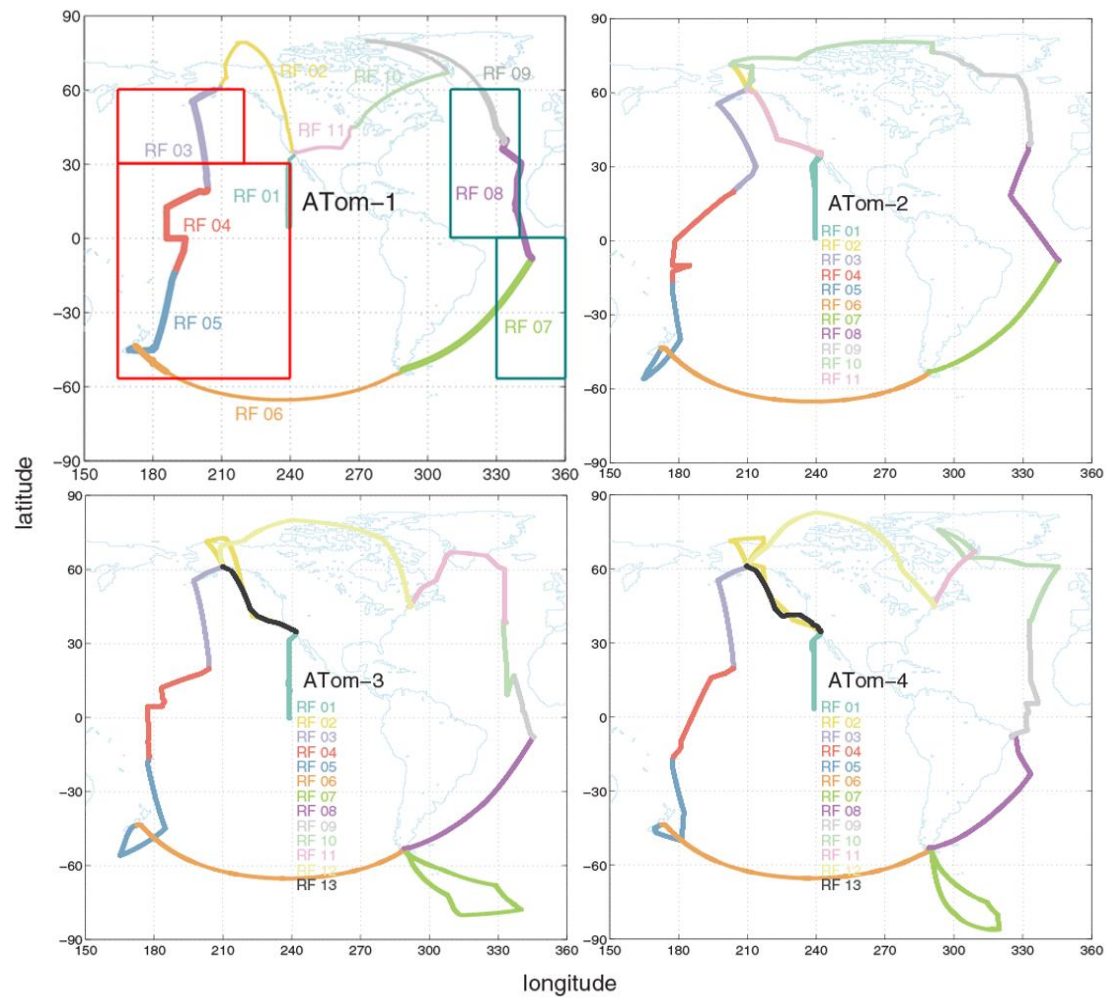

**Fig. S1.** Flight tracks for the 4 ATom deployments. For ATom-1, the flight segments considered Pacific and Atlantic domains for this paper are shown with very thick lines. The corresponding blocks used for model climatologies are outlined with rectangles: Pacific, red; Atlantic, blue-green.

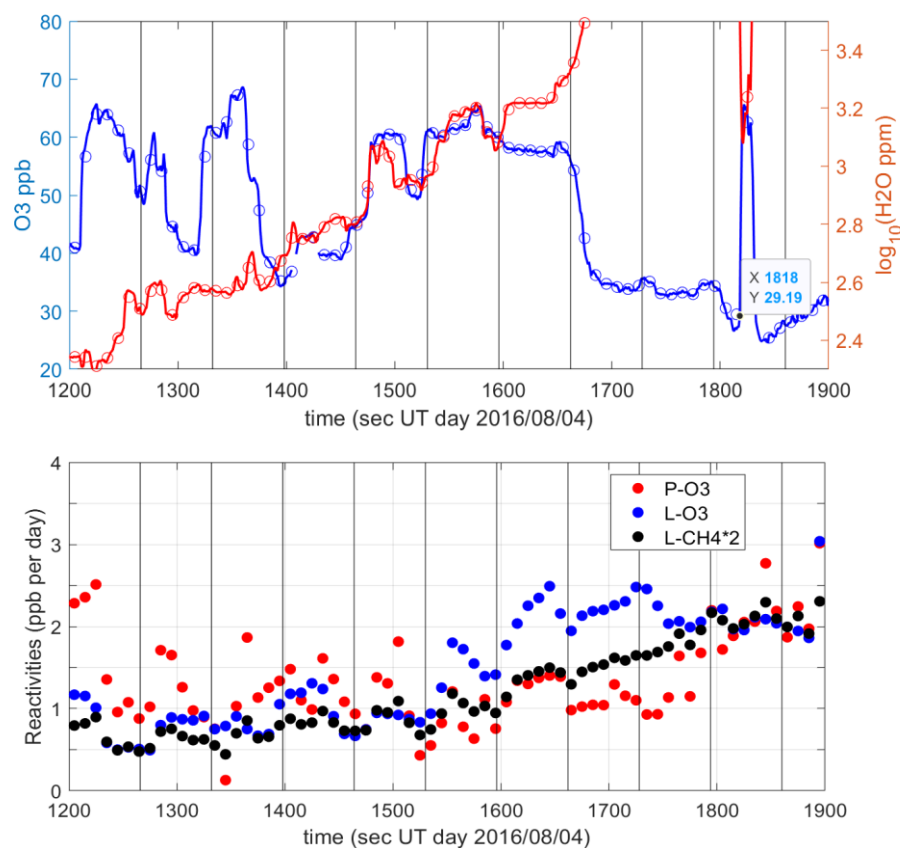

**Fig. S2.** Profile during a descent on the Anchorage-Kona flight (ATom-1, RF-3, 31° N). The profile here begins at 7.2 km (1200 s) and ends at 2.1 km (1900 s,  $H_2O$  is cut off). (a) Fine structure in  $O_3$  (ppb) and  $H_2O$  ( $\log_{10}$ , ppm) at 1 s (solid line) and 10 s (open circles) resolution. (b) Reactivities for the 10 s parcels calculated with the UCI CTM. Descent rate averaged 7.5 m/s, and vertical lines indicate 500 m thick layers.

430

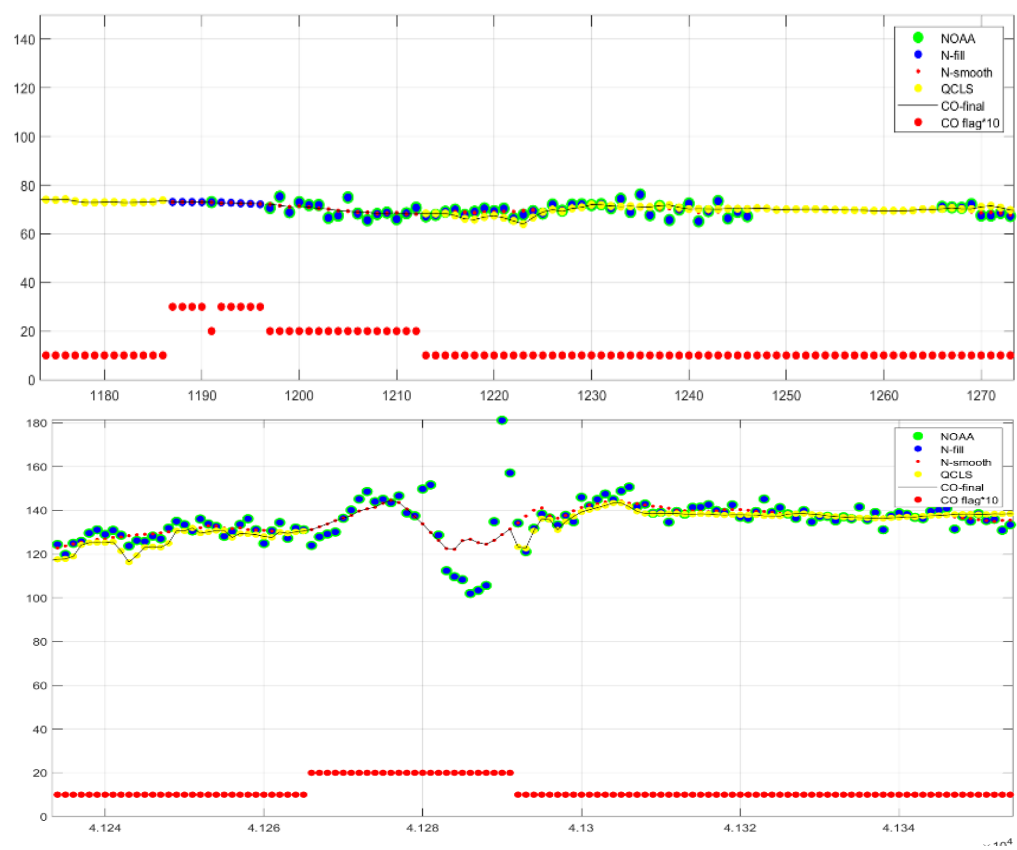

**Fig. S3.** Example of CO time series showing all the intermediate CO products and flags. See legend and text.

431

432

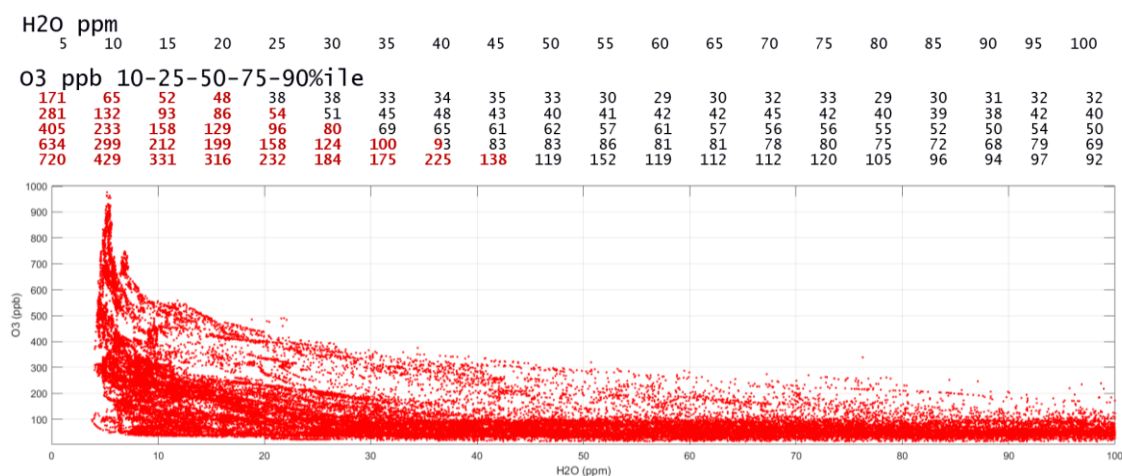

**Fig. S4a.** Scatter plot of O<sub>3</sub> (ppb) and H<sub>2</sub>O (ppm) for all ATom deployments, filtered by H<sub>2</sub>O < 100 ppm. The percentiles (10–25–50–75–90 %ile) of O<sub>3</sub> in each 5-ppm-wide bin starting at 5 ppm (= 2.5–7.5 ppm) ending at 100 pm in in the table at the top of this Fig.. Stratospheric influence (red) is clearly seen in the median for < 30 ppm.

433

434

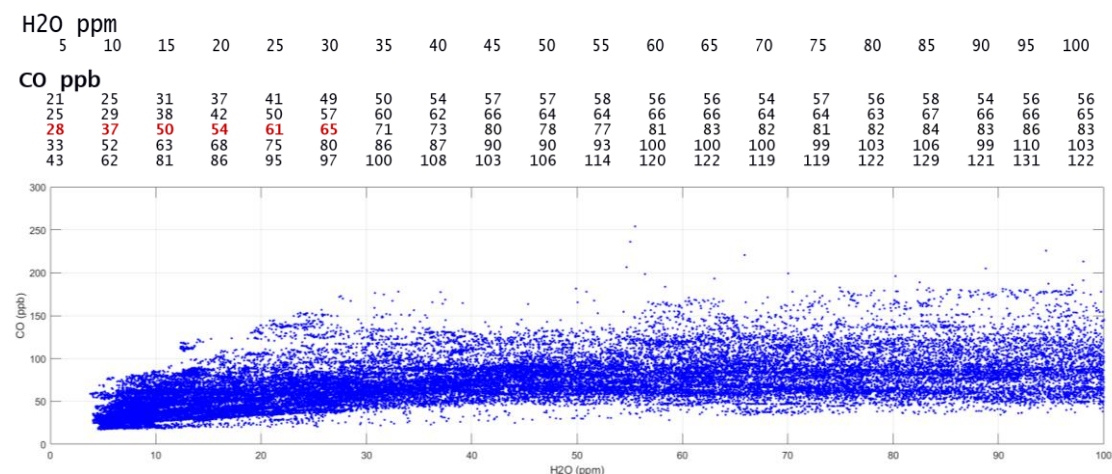

**Fig. S4b.** Scatter plot of CO (ppb) and H<sub>2</sub>O (ppm) for all ATom deployments, filtered by H<sub>2</sub>O < 100 ppm. See Fig. S4a.

435

436

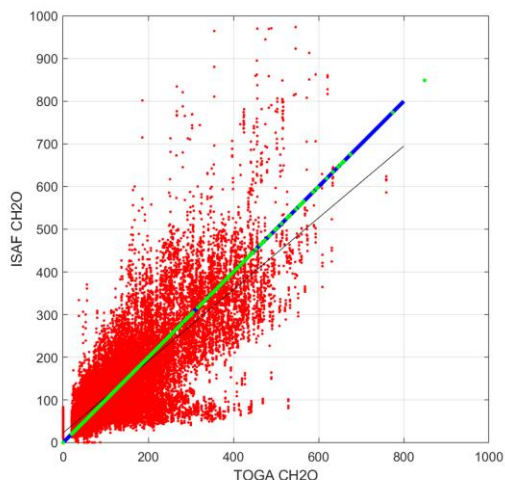

**Fig. S5.** Scatter plot of coincident HCHO measurements (ppb) from ISAF and TOGA for all ATom deployments. The thick blue-green line is the 1:1 relationship and the thin black line shows a linear regression of ISAF vs. TOGA. Notably, ISAF has more frequent high values > 600 ppb, with some above 1000 ppb (not shown).

437

438

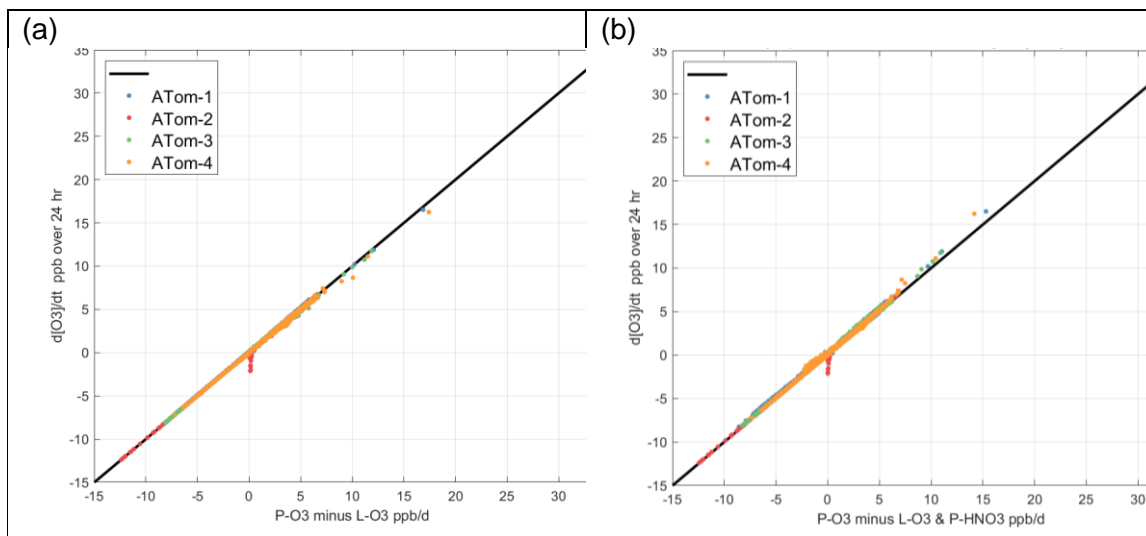

439

440

441

442

443

444

445

446

447

448

449

450

451

452

453

454

**Fig. S6(a)** The  $O_3$  tendency  $d[O_3]/dt$  over the 24 h integration of reactivities versus the P-O3 minus L-O3 (ppb/d) diagnosed from a few key rates. Results are shown for the four ATom deployments and use the CTM calculations for the third day of the five used to calculate the mean reactivities. Only the ocean basins,  $53^\circ S$ – $60^\circ N$ , are included (about 60 % of all MDS parcels). Some rates affecting odd oxygen are not included in the P-O3 and L-O3, and thus the error in our net  $O_3$  reactivities is P minus L minus  $d[O_3]/dt$ . The mean error is very small,  $-0.01$  ppb/d with a root-mean-squared error of  $0.04$  ppb/d, convincing us that we have accurately diagnosed the P-O3 and L-O3 terms. As an example of missing rates, the production of  $HNO_3$  involves loss of  $NO_2$ , which could be seen as a loss of odd-oxygen. Thus in (b), the P-O3 minus L-O3 is augmented by subtracting P-HNO3. In this case we see a shift of the points to slightly above the 1:1 line, indicating that odd-nitrogen driven loss of  $O_3$  is likely the explanation. The few but very obvious red points (ATom-2) below the 1:1 line at P minus L  $\sim 0$  do not shift like the others and investigation shows they are marine boundary layer parcels with extremely large hydrocarbon and  $NO_x$  abundances, possibly a ship plume.

| <b>Table S1. ATom flight data</b>                                   |                     |             |          |              |            |          |                                   |            |
|---------------------------------------------------------------------|---------------------|-------------|----------|--------------|------------|----------|-----------------------------------|------------|
| ATom research flights in the Mor.2020-05-27...tbl (149,133 parcels) |                     |             |          |              |            |          | Airport removed (146,494 parcels) |            |
| ATom deployment                                                     | Research Flight no. | ATom flight | Airports | parcel begin | parcel end | YYYYMMDD | parcel begin                      | parcel end |
| 1                                                                   | 1                   | 1           | PMD PMD* | 1            | 3380       | 20160729 | 1                                 | 3333       |
| 1                                                                   | 2                   | 2           | PMD ANC  | 3381         | 7038       | 20160801 | 3334                              | 6939       |
| 1                                                                   | 3                   | 3           | ANC KOA  | 7039         | 9658       | 20160803 | 6940                              | 9526       |
| 1                                                                   | 4                   | 4           | KOA PPG  | 9659         | 12760      | 20160806 | 9527                              | 12583      |
| 1                                                                   | 5                   | 5           | PPG CHC  | 12761        | 15141      | 20160808 | 12584                             | 14917      |
| 1                                                                   | 6                   | 6           | CHC PUQ  | 15142        | 18976      | 20160812 | 14918                             | 18692      |
| 1                                                                   | 7                   | 7           | PUQ ASI  | 18977        | 22355      | 20160815 | 18693                             | 21998      |
| 1                                                                   | 8                   | 8           | ASI TER  | 22356        | 25431      | 20160817 | 21999                             | 25040      |
| 1                                                                   | 9                   | 9           | TER SFJ  | 25432        | 28976      | 20160820 | 25041                             | 28544      |
| 1                                                                   | 10                  | 10          | SFJ MSP  | 28977        | 31127      | 20160822 | 28545                             | 30663      |
| 1                                                                   | 11                  | 11          | MSP PMD  | 31128        | 32899      | 20160823 | 30664                             | 32383      |
| 2                                                                   | 1                   | 12          | PMD PMD* | 32900        | 36621      | 20170126 | 32384                             | 36061      |
| 2                                                                   | 2                   | 13          | PMD ANC  | 36622        | 40115      | 20170129 | 36062                             | 39480      |
| 2                                                                   | 3                   | 14          | ANC KOA  | 40116        | 43062      | 20170201 | 39481                             | 42360      |
| 2                                                                   | 4                   | 15          | KOA NAN  | 43063        | 46470      | 20170203 | 42361                             | 45717      |
| 2                                                                   | 5                   | 16          | NAN CHC  | 46471        | 49562      | 20170205 | 45718                             | 48774      |
| 2                                                                   | 6                   | 17          | CHC PUQ  | 49563        | 53116      | 20170210 | 48775                             | 52267      |
| 2                                                                   | 7                   | 18          | PUQ ASI  | 53117        | 56358      | 20170213 | 52268                             | 55390      |
| 2                                                                   | 8                   | 19          | ASI TER  | 56359        | 59468      | 20170215 | 55391                             | 58446      |
| 2                                                                   | 9                   | 20          | TER THU  | 59469        | 62151      | 20170218 | 58447                             | 61088      |
| 2                                                                   | 10                  | 21          | THU ANC  | 62152        | 64893      | 20170219 | 61089                             | 63762      |
| 2                                                                   | 11                  | 22          | ANC PMD  | 64894        | 66978      | 20170221 | 63763                             | 65807      |
| 3                                                                   | 1                   | 23          | PMD PMD* | 66979        | 70683      | 20170928 | 65808                             | 69465      |
| 3                                                                   | 2                   | 24          | PMD ANC  | 70684        | 74281      | 20171001 | 69466                             | 73001      |
| 3                                                                   | 3                   | 25          | ANC KOA  | 74282        | 76949      | 20171004 | 73002                             | 75608      |
| 3                                                                   | 4                   | 26          | KOA NAN  | 76950        | 80163      | 20171006 | 75609                             | 78754      |
| 3                                                                   | 5                   | 27          | NAN CHC  | 80164        | 83472      | 20171008 | 78755                             | 82000      |
| 3                                                                   | 6                   | 28          | CHC PUQ  | 83473        | 87028      | 20171011 | 82001                             | 85462      |
| 3                                                                   | 7                   | 29          | PUQ PUQ^ | 87029        | 90872      | 20171014 | 85463                             | 89225      |
| 3                                                                   | 8                   | 30          | PUQ ASI  | 90873        | 94279      | 20171017 | 89226                             | 92576      |
| 3                                                                   | 9                   | 31          | ASI SID  | 94280        | 95928      | 20171019 | 92577                             | 94191      |
| 3                                                                   | 10                  | 32          | SID TER  | 95929        | 98695      | 20171020 | 94192                             | 96916      |
| 3                                                                   | 11                  | 33          | TER BGR  | 98696        | 102094     | 20171023 | 96917                             | 100272     |
| 3                                                                   | 12                  | 34          | BGR ANC  | 102095       | 105540     | 20171025 | 100273                            | 103677     |
| 3                                                                   | 13                  | 35          | ANC PMD  | 105541       | 107873     | 20171027 | 103678                            | 105983     |
| 4                                                                   | 1                   | 36          | PMD PMD* | 107874       | 111294     | 20180424 | 105984                            | 109357     |
| 4                                                                   | 2                   | 37          | PMD ANC  | 111295       | 115012     | 20180427 | 109358                            | 113028     |
| 4                                                                   | 3                   | 38          | ANC KOA  | 115013       | 117934     | 20180429 | 113029                            | 115847     |
| 4                                                                   | 4                   | 39          | KOA NAN  | 117935       | 120880     | 20180501 | 115848                            | 118741     |
| 4                                                                   | 5                   | 40          | NAN CHC  | 120881       | 123717     | 20180503 | 118742                            | 121542     |
| 4                                                                   | 6                   | 41          | CHC PUQ  | 123718       | 127370     | 20180506 | 121543                            | 125122     |
| 4                                                                   | 7                   | 42          | PUQ PUQ^ | 127371       | 131238     | 20180509 | 125123                            | 128934     |
| 4                                                                   | 8                   | 43          | PUQ REC  | 131239       | 134829     | 20180512 | 128935                            | 132463     |
| 4                                                                   | 9                   | 44          | REC TER  | 134830       | 138214     | 20180514 | 132464                            | 135770     |
| 4                                                                   | 10                  | 45          | TER SFJ  | 138215       | 141697     | 20180517 | 135771                            | 139210     |
| 4                                                                   | 11                  | 46          | SFJ BGR  | 141698       | 142846     | 20180518 | 139211                            | 140316     |
| 4                                                                   | 12                  | 47          | BGR ANC  | 142847       | 146670     | 20180519 | 140317                            | 144095     |
| 4                                                                   | 13                  | 48          | ANC PMD  | 146671       | 149133     | 20180521 | 144096                            | 146494     |

\* 4 flights to equator following 120W. ^ 2 flights to 80S and 86S over Antarctica.



| <b>Table S2. MDS data and source</b> |                             |                                                                           |                                                                                              |
|--------------------------------------|-----------------------------|---------------------------------------------------------------------------|----------------------------------------------------------------------------------------------|
| <b>id#</b>                           | <b>MDS data designation</b> | <b>Description</b>                                                        | <b>ATom source name</b>                                                                      |
| 1                                    | parcel_M                    | Unique sequential parcel number for all MDS 10s data, beginning 1,000,001 |                                                                                              |
| 2                                    | ATno                        | ATom deployment number (1:4)                                              | A.no                                                                                         |
| 3                                    | RFno                        | Research Flight number (1:11, 1:11, 1:13, 1:13)                           | RF                                                                                           |
| 4                                    | RRno                        | RF number across all of ATom (1:48)                                       |                                                                                              |
| 5                                    | YYMMDD                      | Date (UT) of the start of each RF                                         | YYYYMMDD                                                                                     |
| 6                                    | UTC_M                       | Start time in sec relative to Date for each 10s parcel                    | UTC_Start                                                                                    |
| 7                                    | Lat_M                       | Latitude (-90:+90)                                                        | G_LAT                                                                                        |
| 8                                    | Lng_M                       | Longitude (-180:+180)                                                     | G_LONG                                                                                       |
| 9                                    | Alt_M                       | Altitude (m above mean sea level)                                         | G_ALT                                                                                        |
| 10                                   | P_M                         | Pressure (hPa)                                                            | P                                                                                            |
| 11                                   | T_M                         | Temperture (K)                                                            | T                                                                                            |
| 12                                   | H2O_M                       | water, ppm (all dry air mole fraction)                                    | H2O_DLH                                                                                      |
| 13                                   | RHw_M                       | relative humidity over liquid water (%)                                   | RHw_DLH                                                                                      |
| 14                                   | O3_M                        | ozone, ppb                                                                | O3_CL                                                                                        |
| 15                                   | CO_M                        | carbon monoxide, ppb                                                      | (1) CO_QCLS, (2) CO_NOAA                                                                     |
| 16                                   | CH4_M                       | methane, ppb                                                              | (1) CH4_NOAA, (2) CH4_QCLS                                                                   |
| 17                                   | NOx_M                       | odd-nitrogen, NO+NO2, ppt                                                 | NO_CL + NO2_CL                                                                               |
| 18                                   | NOxPSS_M                    | odd-nitrogen, with photo-stationary state NO2, ppt                        | NOx_PSS                                                                                      |
| 19                                   | HNO3_M                      | nitric acid, HONO2, ppt                                                   | HNO3_CIT                                                                                     |
| 20                                   | HNO4_M                      | pernitric acid, HO2NO2, ppt                                               | PNA_CIT                                                                                      |
| 21                                   | PAN_M                       | peroxyacetyl nitrate, C2H3NO5 - CH3C(O)OONO2, ppt                         | (1) PAN_GTCIMS, (2) PAN_PECDD*                                                               |
| 22                                   | CH2O_M                      | formaldehyde, HCHO, ppt                                                   | (1) CH2O_ISAF, (2) CH2O_TOGA                                                                 |
| 23                                   | H2O2_M                      | hydrogen peroxide, HOOH, ppt                                              | H2O2_CIT                                                                                     |
| 24                                   | CH3OOH_M                    | methyl hydrogen peroxide, ppt                                             | MHP_CIT                                                                                      |
| 25                                   | Acetone_M                   | acetone, CH3C(O)CH3, ppt                                                  | Acetone_TOGA                                                                                 |
| 26                                   | Acetald_M                   | acetaldehyde, CH3C(O)H, ppt                                               | CH3CHO_TOGA                                                                                  |
| 27                                   | C2H6_M                      | ethane, C2H6, ppt                                                         | Ethane_WAS                                                                                   |
| 28                                   | C3H8_M                      | propane, C3H8, ppt                                                        | (1) Propane_WAS, (2) Propane_TOGA                                                            |
| 29                                   | iC4H10_M                    | iso-butane, iC4H10, ppt                                                   | (1) iButane_WAS, (2) iButane_TOGA                                                            |
| 30                                   | nC4H10_M                    | n-butane, nC4H10, ppt                                                     | (1) nButane_WAS, (2) nButane_TOGA                                                            |
| 31                                   | Alkanes_M                   | pentane (C5H12) and higher, ppt                                           | iPentane_WAS + nPentane_WAS + nHexane_WAS + nHeptane_WAS + x2MePentane_WAS + x3MePentane_WAS |
| 32                                   | C2H4_M                      | ethene, C2H4, ppt                                                         | Ethene_WAS                                                                                   |
| 33                                   | Alkenes_M                   | propene (C3H6) and higher, ppt                                            | Propene_WAS                                                                                  |
| 34                                   | C2H2_M                      | acetylene (ethyne), C2H2, ppt                                             | Ethyne_WAS                                                                                   |
| 35                                   | C5H8_M                      | isoprene, C5H8, ppt                                                       | (1) Isoprene_TOGA, (2) Isoprene_WAS                                                          |
| 36                                   | Benzene_M                   | benzene, C6H6, ppt                                                        | (1) Benzene_TOGA, (2) Benzene_WAS*                                                           |

|                                                                                                                                                                                                                                                                                                                                                                                                    |                      |                                                                                                |                                                                                                    |
|----------------------------------------------------------------------------------------------------------------------------------------------------------------------------------------------------------------------------------------------------------------------------------------------------------------------------------------------------------------------------------------------------|----------------------|------------------------------------------------------------------------------------------------|----------------------------------------------------------------------------------------------------|
| 37                                                                                                                                                                                                                                                                                                                                                                                                 | Toluene_M            | methylbenzene, C <sub>7</sub> H <sub>8</sub> , ppt                                             | (1) Toluene_TOGA+EthBenzene_TOGA, (2) Toluene_WAS + EthBenzene_WAS                                 |
| 38                                                                                                                                                                                                                                                                                                                                                                                                 | Xylene_M             | dimethylbenzene, C <sub>8</sub> H <sub>10</sub> , ppt                                          | (1) mpXylene_TOGA+oXylene_TOGA, (2) mpXylene_WAS+oXylene_WAS                                       |
| 39                                                                                                                                                                                                                                                                                                                                                                                                 | MeONO2_M             | methyl nitrate, CH <sub>3</sub> ONO <sub>2</sub> , ppt                                         | MeONO2_WAS                                                                                         |
| 40                                                                                                                                                                                                                                                                                                                                                                                                 | EtONO2_M             | ethyl nitrate, CH <sub>3</sub> ONO <sub>2</sub> , ppt                                          | EthONO2_WAS                                                                                        |
| 41                                                                                                                                                                                                                                                                                                                                                                                                 | RONO2_M              | higher organo nitrates, R=C <sub>3</sub> +, ppt                                                | iPropONO2_WAS + nPropONO2_WAS + x2ButONO2_WAS + x3PentONO2_WAS + x2PentONO2_WAS + x3Me2ButONO2_WAS |
| 42                                                                                                                                                                                                                                                                                                                                                                                                 | MeOH_M               | methanol, CH <sub>3</sub> OH, ppt                                                              | CH <sub>3</sub> OH_TOGA                                                                            |
| 43                                                                                                                                                                                                                                                                                                                                                                                                 | HCN_M                | hydrogen cyanide, ppt                                                                          | (1) HCN_CIT, (2) HCN_TOGA                                                                          |
| 44                                                                                                                                                                                                                                                                                                                                                                                                 | CH <sub>3</sub> CN_M | acetonitrile (methyl cyanide), CH <sub>3</sub> CN, ppt                                         | CH <sub>3</sub> CN_TOGA                                                                            |
| 45                                                                                                                                                                                                                                                                                                                                                                                                 | SF <sub>6</sub> _M   | sulfure hexafluoride, ppt                                                                      | (1) SF <sub>6</sub> _PECD, (2) SF <sub>6</sub> _UCATS                                              |
| 46                                                                                                                                                                                                                                                                                                                                                                                                 | S_nuc_M              | particle surface area (um <sup>2</sup> /cm <sup>3</sup> ), nucleation: 0.0027 < Dp <= 0.012 um | S_nucl_AMP                                                                                         |
| 47                                                                                                                                                                                                                                                                                                                                                                                                 | S_atk_M              | particle surface area (um <sup>2</sup> /cm <sup>3</sup> ), Aitken: 0.012 < Dp <=0.06 um        | S_aitken_AMP                                                                                       |
| 48                                                                                                                                                                                                                                                                                                                                                                                                 | S_acc_M              | particle surface area (um <sup>2</sup> /cm <sup>3</sup> ), accumulation: 0.06 < Dp <=0.50 um   | S_accum_AMP                                                                                        |
| 49                                                                                                                                                                                                                                                                                                                                                                                                 | S_crs_M              | particle surface area (um <sup>2</sup> /cm <sup>3</sup> ), coarse: 0.50 < Dp <=4.8 um          | S_coarse_AMP                                                                                       |
| 50                                                                                                                                                                                                                                                                                                                                                                                                 | CloudInd_M           | cloud indicator (0:4), dimensionless                                                           | cloudindicator_CAPS                                                                                |
| Note: The flag value, flag_M(:,1:50) is indexed to the 50 variables above. Only flag_M(:,10:50) have meaningful values. The flag values are: 0 (NaNs, only in research flight 46), 1 (primary data), 2 (secondary data), 3 (short-gap interpolation), 4 (long-gap interpolation for troposphere), 5 (missing flight filled) and 6 (long-gap interpolation for stratosphere) are described in text. |                      |                                                                                                |                                                                                                    |

458

| <b>Table S3a. ATom-1, % of non-NaNs after short-gap interpolation</b> |             |             |             |             |             |             |             |             |             |             |             |
|-----------------------------------------------------------------------|-------------|-------------|-------------|-------------|-------------|-------------|-------------|-------------|-------------|-------------|-------------|
| <b>RRno</b>                                                           | <b>1</b>    | <b>2</b>    | <b>3</b>    | <b>4</b>    | <b>5</b>    | <b>6</b>    | <b>7</b>    | <b>8</b>    | <b>9</b>    | <b>10</b>   | <b>11</b>   |
| <Lat> (deg)                                                           | 20          | 62          | 42          | 4           | -34         | -58         | -32         | 18          | 65          | 55          | 38          |
| <Lng> (deg)                                                           | -120        | -133        | -158        | -169        | -83         | -87         | -37         | -21         | -49         | -78         | -104        |
| <Alt> (m)                                                             | 7055        | 8092        | 7118        | 6143        | 6634        | 7034        | 6761        | 6494        | 6930        | 6090        | 7736        |
| <b># parcels</b>                                                      | <b>3333</b> | <b>3606</b> | <b>2587</b> | <b>3057</b> | <b>2334</b> | <b>3775</b> | <b>3306</b> | <b>3042</b> | <b>3504</b> | <b>2119</b> | <b>1720</b> |
| H2O_M                                                                 | 100%        | 100%        | 100%        | 100%        | 100%        | 100%        | 100%        | 100%        | 100%        | 100%        | 100%        |
| RHw_M                                                                 | 100%        | 100%        | 100%        | 100%        | 100%        | 100%        | 100%        | 100%        | 100%        | 100%        | 100%        |
| O3_M                                                                  | 99%         | 99%         | 100%        | 99%         | 100%        | 100%        | 99%         | 100%        | 100%        | 100%        | 100%        |
| CO_M                                                                  | 100%        | 100%        | 100%        | 100%        | 100%        | 100%        | 100%        | 100%        | 100%        | 100%        | 100%        |
| CH4_M                                                                 | 54%         | 95%         | 95%         | 94%         | 86%         | 93%         | 94%         | 92%         | 95%         | 95%         | 93%         |
| NOx_M                                                                 | 90%         | 94%         | 91%         | 84%         | 91%         | 85%         | 96%         | 98%         | 89%         | 95%         | 94%         |
| NOxPSS_M                                                              | 94%         | 91%         | 91%         | 86%         | 88%         | 28%         | 67%         | 95%         | 88%         | 95%         | 92%         |
| HNO3_M                                                                | 92%         | 96%         | 97%         | 92%         | 0%          | 95%         | 95%         | 97%         | 96%         | 97%         | 97%         |
| HNO4_M                                                                | 59%         | 87%         | 74%         | 67%         | 0%          | 90%         | 85%         | 67%         | 88%         | 73%         | 66%         |
| PAN_M                                                                 | 78%         | 67%         | 48%         | 90%         | 40%         | 87%         | 97%         | 93%         | 98%         | 92%         | 95%         |
| CH2O_M                                                                | 99%         | 100%        | 100%        | 100%        | 100%        | 100%        | 100%        | 100%        | 100%        | 100%        | 100%        |
| H2O2_M                                                                | 92%         | 96%         | 97%         | 92%         | 0%          | 95%         | 95%         | 97%         | 96%         | 97%         | 97%         |
| CH3OOH_M                                                              | 56%         | 69%         | 81%         | 83%         | 84%         | 79%         | 81%         | 82%         | 82%         | 79%         | 79%         |
| Acetone_M                                                             | 89%         | 92%         | 88%         | 98%         | 92%         | 90%         | 93%         | 94%         | 94%         | 94%         | 94%         |
| Acetald_M                                                             | 89%         | 92%         | 88%         | 98%         | 90%         | 90%         | 90%         | 94%         | 93%         | 94%         | 94%         |
| C2H6_M                                                                | 50%         | 32%         | 43%         | 44%         | 62%         | 37%         | 39%         | 43%         | 40%         | 46%         | 45%         |
| C3H8_M                                                                | 90%         | 95%         | 92%         | 97%         | 97%         | 95%         | 96%         | 97%         | 96%         | 98%         | 95%         |
| iC4H10_M                                                              | 95%         | 95%         | 92%         | 98%         | 97%         | 95%         | 96%         | 97%         | 98%         | 98%         | 96%         |
| nC4H10_M                                                              | 95%         | 95%         | 92%         | 98%         | 97%         | 95%         | 96%         | 97%         | 98%         | 98%         | 96%         |
| Alkanes_M                                                             | 50%         | 32%         | 43%         | 44%         | 62%         | 37%         | 39%         | 43%         | 40%         | 46%         | 45%         |
| C2H4_M                                                                | 50%         | 32%         | 43%         | 44%         | 62%         | 37%         | 39%         | 43%         | 40%         | 46%         | 45%         |
| Alkenes_M                                                             | 50%         | 32%         | 43%         | 44%         | 62%         | 37%         | 39%         | 43%         | 40%         | 46%         | 45%         |
| C2H2_M                                                                | 50%         | 32%         | 43%         | 44%         | 62%         | 37%         | 39%         | 43%         | 40%         | 46%         | 45%         |
| C5H8_M                                                                | 95%         | 95%         | 92%         | 98%         | 97%         | 95%         | 96%         | 97%         | 98%         | 98%         | 96%         |
| Benzene_M                                                             | 95%         | 95%         | 92%         | 98%         | 97%         | 95%         | 96%         | 97%         | 98%         | 98%         | 96%         |
| Toluene_M                                                             | 100%        | 99%         | 94%         | 98%         | 98%         | 99%         | 100%        | 99%         | 100%        | 100%        | 99%         |
| Xylene_M                                                              | 100%        | 99%         | 94%         | 98%         | 98%         | 99%         | 100%        | 99%         | 100%        | 100%        | 99%         |
| MeONO2_M                                                              | 50%         | 32%         | 43%         | 44%         | 55%         | 37%         | 39%         | 43%         | 33%         | 43%         | 43%         |
| EtONO2_M                                                              | 50%         | 31%         | 40%         | 43%         | 47%         | 28%         | 34%         | 42%         | 31%         | 39%         | 39%         |
| RONO2_M                                                               | 50%         | 32%         | 43%         | 44%         | 62%         | 37%         | 39%         | 43%         | 40%         | 46%         | 45%         |
| MeOH_M                                                                | 89%         | 92%         | 88%         | 98%         | 92%         | 90%         | 92%         | 92%         | 92%         | 94%         | 94%         |
| HCN_M                                                                 | 98%         | 100%        | 100%        | 100%        | 92%         | 100%        | 100%        | 100%        | 100%        | 100%        | 100%        |
| CH3CN_M                                                               | 89%         | 92%         | 88%         | 98%         | 92%         | 90%         | 93%         | 94%         | 94%         | 94%         | 91%         |
| SF6_M                                                                 | 90%         | 88%         | 98%         | 92%         | 91%         | 80%         | 96%         | 79%         | 99%         | 90%         | 84%         |
| S_nuc_M                                                               | 95%         | 92%         | 93%         | 99%         | 92%         | 87%         | 91%         | 94%         | 91%         | 88%         | 93%         |
| S_atk_M                                                               | 95%         | 92%         | 93%         | 99%         | 92%         | 87%         | 91%         | 94%         | 91%         | 88%         | 93%         |
| S_acc_M                                                               | 95%         | 92%         | 93%         | 99%         | 92%         | 87%         | 91%         | 93%         | 91%         | 88%         | 93%         |
| S_crs_M                                                               | 95%         | 92%         | 93%         | 99%         | 92%         | 87%         | 91%         | 93%         | 91%         | 88%         | 93%         |
| CloudInd_M                                                            | 100%        | 100%        | 100%        | 100%        | 99%         | 100%        | 100%        | 100%        | 100%        | 100%        | 100%        |

| <b>Table S3b. ATom-2, % of non-NaNs after short-gap interpolation</b> |             |             |             |             |             |             |             |             |             |             |             |
|-----------------------------------------------------------------------|-------------|-------------|-------------|-------------|-------------|-------------|-------------|-------------|-------------|-------------|-------------|
| <b>RRno</b>                                                           | <b>12</b>   | <b>13</b>   | <b>14</b>   | <b>15</b>   | <b>16</b>   | <b>17</b>   | <b>18</b>   | <b>19</b>   | <b>20</b>   | <b>21</b>   | <b>22</b>   |
| <Lat> (deg)                                                           | 18          | 55          | 40          | 0           | -41         | -58         | -32         | 15          | 60          | 73          | 45          |
| <Lng> (deg)                                                           | -120        | -142        | -154        | -46         | 138         | -89         | -37         | -28         | -38         | -129        | -135        |
| <Alt> (m)                                                             | 8477        | 6915        | 5726        | 7514        | 7233        | 7629        | 8835        | 6832        | 5869        | 5553        | 6969        |
| <b># parcels</b>                                                      | <b>3678</b> | <b>3419</b> | <b>2880</b> | <b>3357</b> | <b>3057</b> | <b>3493</b> | <b>3123</b> | <b>3056</b> | <b>2642</b> | <b>2674</b> | <b>2045</b> |
| H2O_M                                                                 | 100%        | 100%        | 100%        | 100%        | 100%        | 100%        | 100%        | 100%        | 100%        | 100%        | 100%        |
| RHw_M                                                                 | 100%        | 100%        | 100%        | 100%        | 100%        | 100%        | 100%        | 100%        | 100%        | 100%        | 100%        |
| O3_M                                                                  | 99%         | 100%        | 100%        | 100%        | 100%        | 100%        | 100%        | 100%        | 100%        | 100%        | 100%        |
| CO_M                                                                  | 100%        | 100%        | 100%        | 100%        | 100%        | 100%        | 100%        | 100%        | 100%        | 100%        | 100%        |
| CH4_M                                                                 | 100%        | 100%        | 100%        | 99%         | 98%         | 99%         | 100%        | 100%        | 100%        | 99%         | 100%        |
| NOx_M                                                                 | 85%         | 89%         | 100%        | 95%         | 82%         | 82%         | 87%         | 80%         | 82%         | 100%        | 96%         |
| NOxPSS_M                                                              |             |             |             |             |             |             |             |             |             |             |             |
| HNO3_M                                                                | 90%         | 0%          | 91%         | 95%         | 96%         | 92%         | 97%         | 97%         | 97%         | 93%         | 98%         |
| HNO4_M                                                                | 82%         | 0%          | 77%         | 70%         | 77%         | 81%         | 87%         | 77%         | 87%         | 93%         | 94%         |
| PAN_M                                                                 | 84%         | 100%        | 100%        | 95%         | 100%        | 100%        | 99%         | 97%         | 94%         | 100%        | 94%         |
| CH2O_M                                                                | 100%        | 100%        | 100%        | 100%        | 100%        | 100%        | 100%        | 100%        | 100%        | 100%        | 100%        |
| H2O2_M                                                                | 90%         | 0%          | 91%         | 95%         | 96%         | 92%         | 97%         | 97%         | 97%         | 93%         | 98%         |
| CH3OOH_M                                                              | 67%         | 62%         | 71%         | 67%         | 65%         | 58%         | 58%         | 59%         | 58%         | 60%         | 56%         |
| Acetone_M                                                             | 91%         | 92%         | 85%         | 97%         | 96%         | 93%         | 95%         | 96%         | 89%         | 91%         | 94%         |
| Acetald_M                                                             | 91%         | 92%         | 85%         | 97%         | 96%         | 93%         | 95%         | 97%         | 89%         | 91%         | 94%         |
| C2H6_M                                                                | 38%         | 28%         | 45%         | 36%         | 42%         | 43%         | 40%         | 47%         | 56%         | 58%         | 61%         |
| C3H8_M                                                                | 95%         | 88%         | 81%         | 94%         | 94%         | 93%         | 87%         | 87%         | 87%         | 58%         | 88%         |
| iC4H10_M                                                              | 97%         | 94%         | 91%         | 97%         | 97%         | 95%         | 95%         | 97%         | 94%         | 95%         | 97%         |
| nC4H10_M                                                              | 97%         | 94%         | 91%         | 97%         | 97%         | 95%         | 95%         | 97%         | 94%         | 95%         | 97%         |
| Alkanes_M                                                             | 38%         | 28%         | 45%         | 36%         | 42%         | 43%         | 40%         | 47%         | 56%         | 58%         | 61%         |
| C2H4_M                                                                | 38%         | 28%         | 45%         | 36%         | 42%         | 43%         | 40%         | 47%         | 56%         | 58%         | 61%         |
| Alkenes_M                                                             | 38%         | 28%         | 45%         | 36%         | 42%         | 43%         | 40%         | 47%         | 56%         | 58%         | 61%         |
| C2H2_M                                                                | 38%         | 28%         | 45%         | 36%         | 42%         | 43%         | 40%         | 47%         | 56%         | 58%         | 61%         |
| C5H8_M                                                                | 97%         | 94%         | 93%         | 97%         | 97%         | 95%         | 96%         | 98%         | 94%         | 96%         | 97%         |
| Benzene_M                                                             | 97%         | 94%         | 93%         | 97%         | 97%         | 95%         | 96%         | 98%         | 94%         | 96%         | 97%         |
| Toluene_M                                                             | 100%        | 96%         | 96%         | 100%        | 100%        | 100%        | 100%        | 100%        | 98%         | 100%        | 100%        |
| Xylene_M                                                              | 100%        | 96%         | 96%         | 100%        | 100%        | 100%        | 100%        | 100%        | 98%         | 100%        | 100%        |
| MeONO2_M                                                              | 37%         | 26%         | 45%         | 36%         | 38%         | 35%         | 40%         | 47%         | 53%         | 54%         | 51%         |
| EtONO2_M                                                              | 37%         | 26%         | 45%         | 36%         | 38%         | 35%         | 40%         | 47%         | 52%         | 54%         | 50%         |
| RONO2_M                                                               | 38%         | 28%         | 45%         | 36%         | 42%         | 43%         | 40%         | 47%         | 56%         | 58%         | 61%         |
| MeOH_M                                                                | 90%         | 92%         | 83%         | 97%         | 92%         | 93%         | 95%         | 97%         | 89%         | 91%         | 94%         |
| HCN_M                                                                 | 99%         | 89%         | 100%        | 100%        | 100%        | 98%         | 100%        | 100%        | 100%        | 93%         | 100%        |
| CH3CN_M                                                               | 91%         | 92%         | 85%         | 97%         | 96%         | 93%         | 95%         | 97%         | 89%         | 87%         | 94%         |
| SF6_M                                                                 | 87%         | 97%         | 96%         | 88%         | 98%         | 99%         | 98%         | 99%         | 99%         | 99%         | 69%         |
| S_nuc_M                                                               | 86%         | 81%         | 98%         | 95%         | 85%         | 95%         | 85%         | 98%         | 75%         | 89%         | 91%         |
| S_atk_M                                                               | 86%         | 81%         | 98%         | 95%         | 85%         | 95%         | 85%         | 98%         | 75%         | 89%         | 91%         |
| S_acc_M                                                               | 86%         | 81%         | 97%         | 95%         | 84%         | 95%         | 85%         | 98%         | 75%         | 88%         | 91%         |
| S_crs_M                                                               | 86%         | 81%         | 97%         | 95%         | 84%         | 95%         | 85%         | 98%         | 75%         | 88%         | 91%         |
| CloudInd_M                                                            | 100%        | 100%        | 100%        | 97%         | 100%        | 100%        | 100%        | 100%        | 100%        | 100%        | 100%        |

| <b>Table S3c. ATom-3, % of non-NaNs after short-gap interpolation</b> |             |             |             |             |             |             |             |             |             |             |             |             |             |
|-----------------------------------------------------------------------|-------------|-------------|-------------|-------------|-------------|-------------|-------------|-------------|-------------|-------------|-------------|-------------|-------------|
| <b>RRno</b>                                                           | <b>23</b>   | <b>24</b>   | <b>25</b>   | <b>26</b>   | <b>27</b>   | <b>28</b>   | <b>29</b>   | <b>30</b>   | <b>31</b>   | <b>32</b>   | <b>33</b>   | <b>34</b>   | <b>35</b>   |
| <Lat> (deg)                                                           | 18          | 55          | 42          | 4           | -41         | -58         | -67         | -32         | 4           | 22          | 55          | 67          | 46          |
| <Lng> (deg)                                                           | -121        | -141        | -158        | -14         | 63          | -91         | -50         | -36         | -19         | -26         | -43         | -105        | -136        |
| <Alt> (m)                                                             | 8988        | 7623        | 6720        | 6781        | 6844        | 6836        | 7263        | 8169        | 6678        | 6329        | 5522        | 6231        | 6033        |
| <b># parcels</b>                                                      | <b>3658</b> | <b>3536</b> | <b>2607</b> | <b>3146</b> | <b>3246</b> | <b>3462</b> | <b>3763</b> | <b>3351</b> | <b>1615</b> | <b>2725</b> | <b>3356</b> | <b>3405</b> | <b>2306</b> |
| H2O_M                                                                 | 100%        | 100%        | 100%        | 100%        | 100%        | 100%        | 100%        | 100%        | 100%        | 100%        | 100%        | 100%        | 100%        |
| RHw_M                                                                 | 100%        | 100%        | 100%        | 100%        | 100%        | 100%        | 100%        | 100%        | 100%        | 100%        | 100%        | 100%        | 100%        |
| O3_M                                                                  | 99%         | 100%        | 100%        | 100%        | 100%        | 100%        | 100%        | 100%        | 89%         | 99%         | 100%        | 100%        | 100%        |
| CO_M                                                                  | 100%        | 100%        | 100%        | 100%        | 100%        | 100%        | 100%        | 100%        | 100%        | 100%        | 100%        | 100%        | 100%        |
| CH4_M                                                                 | 100%        | 98%         | 100%        | 100%        | 100%        | 100%        | 100%        | 100%        | 100%        | 100%        | 100%        | 100%        | 100%        |
| NOx_M                                                                 | 0%          | 98%         | 100%        | 100%        | 97%         | 100%        | 87%         | 94%         | 89%         | 94%         | 99%         | 100%        | 100%        |
| NOxPSS_M                                                              |             |             |             |             |             |             |             |             |             |             |             |             |             |
| HNO3_M                                                                | 96%         | 96%         | 96%         | 95%         | 97%         | 91%         | 94%         | 96%         | 91%         | 85%         | 97%         | 90%         | 66%         |
| HNO4_M                                                                | 0%          | 0%          | 0%          | 0%          | 0%          | 0%          | 0%          | 0%          | 0%          | 0%          | 0%          | 0%          | 0%          |
| PAN_M                                                                 | 100%        | 100%        | 100%        | 98%         | 100%        | 100%        | 99%         | 99%         | 100%        | 98%         | 100%        | 98%         | 100%        |
| CH2O_M                                                                | 100%        | 100%        | 100%        | 100%        | 100%        | 100%        | 98%         | 100%        | 100%        | 100%        | 100%        | 100%        | 100%        |
| H2O2_M                                                                | 96%         | 96%         | 96%         | 95%         | 97%         | 91%         | 94%         | 96%         | 91%         | 85%         | 97%         | 90%         | 95%         |
| CH3OOH_M                                                              | 61%         | 59%         | 59%         | 60%         | 58%         | 58%         | 59%         | 61%         | 58%         | 53%         | 67%         | 60%         | 64%         |
| Acetone_M                                                             | 94%         | 95%         | 87%         | 95%         | 96%         | 97%         | 92%         | 96%         | 86%         | 93%         | 94%         | 98%         | 98%         |
| Acetald_M                                                             | 94%         | 95%         | 87%         | 97%         | 97%         | 97%         | 92%         | 96%         | 86%         | 96%         | 94%         | 98%         | 98%         |
| C2H6_M                                                                | 46%         | 47%         | 61%         | 57%         | 52%         | 48%         | 33%         | 33%         | 36%         | 33%         | 40%         | 39%         | 50%         |
| C3H8_M                                                                | 95%         | 97%         | 94%         | 98%         | 98%         | 98%         | 95%         | 97%         | 92%         | 96%         | 94%         | 98%         | 98%         |
| iC4H10_M                                                              | 95%         | 97%         | 94%         | 99%         | 98%         | 98%         | 95%         | 97%         | 91%         | 96%         | 94%         | 98%         | 98%         |
| nC4H10_M                                                              | 95%         | 97%         | 94%         | 99%         | 98%         | 98%         | 95%         | 97%         | 91%         | 96%         | 94%         | 98%         | 98%         |
| Alkanes_M                                                             | 46%         | 47%         | 61%         | 57%         | 52%         | 48%         | 34%         | 34%         | 39%         | 33%         | 40%         | 39%         | 50%         |
| C2H4_M                                                                | 46%         | 47%         | 61%         | 57%         | 52%         | 48%         | 34%         | 34%         | 39%         | 33%         | 40%         | 39%         | 50%         |
| Alkenes_M                                                             | 46%         | 47%         | 61%         | 57%         | 52%         | 48%         | 34%         | 34%         | 39%         | 33%         | 40%         | 39%         | 50%         |
| C2H2_M                                                                | 46%         | 47%         | 61%         | 57%         | 46%         | 46%         | 34%         | 33%         | 39%         | 33%         | 40%         | 39%         | 50%         |
| C5H8_M                                                                | 95%         | 97%         | 94%         | 99%         | 98%         | 98%         | 95%         | 97%         | 92%         | 96%         | 94%         | 98%         | 98%         |
| Benzene_M                                                             | 95%         | 97%         | 94%         | 99%         | 98%         | 98%         | 95%         | 97%         | 92%         | 96%         | 94%         | 98%         | 98%         |
| Toluene_M                                                             | 100%        | 100%        | 95%         | 100%        | 100%        | 100%        | 99%         | 100%        | 95%         | 100%        | 100%        | 100%        | 100%        |
| Xylene_M                                                              | 100%        | 100%        | 95%         | 100%        | 100%        | 100%        | 99%         | 100%        | 95%         | 100%        | 100%        | 100%        | 100%        |
| MeONO2_M                                                              | 46%         | 47%         | 61%         | 57%         | 52%         | 48%         | 34%         | 34%         | 39%         | 33%         | 40%         | 39%         | 50%         |
| EtONO2_M                                                              | 46%         | 47%         | 61%         | 57%         | 52%         | 48%         | 34%         | 34%         | 39%         | 33%         | 40%         | 39%         | 50%         |
| RONO2_M                                                               | 46%         | 47%         | 61%         | 57%         | 52%         | 48%         | 34%         | 34%         | 39%         | 33%         | 40%         | 39%         | 50%         |
| MeOH_M                                                                | 94%         | 95%         | 87%         | 97%         | 97%         | 97%         | 92%         | 96%         | 86%         | 96%         | 94%         | 98%         | 98%         |
| HCN_M                                                                 | 100%        | 99%         | 100%        | 100%        | 100%        | 100%        | 100%        | 100%        | 100%        | 100%        | 100%        | 100%        | 100%        |
| CH3CN_M                                                               | 94%         | 95%         | 87%         | 96%         | 95%         | 97%         | 92%         | 96%         | 86%         | 95%         | 94%         | 98%         | 98%         |
| SF6_M                                                                 | 77%         | 100%        | 76%         | 84%         | 60%         | 96%         | 95%         | 83%         | 91%         | 99%         | 97%         | 82%         | 92%         |
| S_nuc_M                                                               | 92%         | 77%         | 74%         | 94%         | 91%         | 86%         | 92%         | 91%         | 99%         | 88%         | 91%         | 81%         | 92%         |
| S_atk_M                                                               | 92%         | 77%         | 74%         | 94%         | 91%         | 86%         | 92%         | 91%         | 99%         | 88%         | 91%         | 81%         | 92%         |
| S_acc_M                                                               | 92%         | 77%         | 67%         | 94%         | 91%         | 86%         | 91%         | 91%         | 99%         | 88%         | 91%         | 81%         | 91%         |
| S_crs_M                                                               | 92%         | 77%         | 67%         | 94%         | 91%         | 86%         | 91%         | 91%         | 99%         | 88%         | 91%         | 81%         | 91%         |
| CloudInd_M                                                            | 98%         | 100%        | 100%        | 100%        | 100%        | 100%        | 100%        | 100%        | 100%        | 100%        | 100%        | 99%         | 100%        |

| Table S3d. ATom-4, % of non-NaNs after short-gap interpolation |      |      |      |      |      |      |      |      |      |      |      |      |      |
|----------------------------------------------------------------|------|------|------|------|------|------|------|------|------|------|------|------|------|
| RRno                                                           | 36   | 37   | 38   | 39   | 40   | 41   | 42   | 43   | 44   | 45   | 46   | 47   | 48   |
| <Lat> (deg)                                                    | 19   | 56   | 42   | 3    | -38  | -59  | -70  | -32  | 13   | 60   | 56   | 67   | 46   |
| <Lng> (deg)                                                    | -121 | -141 | -158 | -132 | 10   | -93  | -59  | -41  | -27  | -37  | -62  | -105 | -135 |
| <Alt> (m)                                                      | 8278 | 6678 | 6123 | 6419 | 5922 | 6843 | 7197 | 6672 | 6729 | 7019 | 9678 | 6759 | 5935 |
| # parcels                                                      | 3374 | 3671 | 2819 | 2894 | 2801 | 3580 | 3812 | 3529 | 3307 | 3440 | 1106 | 3779 | 2399 |
| H2O_M                                                          | 100% | 100% | 100% | 100% | 100% | 100% | 100% | 100% | 100% | 100% | 100% | 100% | 100% |
| RHw_M                                                          | 100% | 100% | 100% | 100% | 100% | 100% | 100% | 100% | 100% | 100% | 100% | 100% | 100% |
| O3_M                                                           | 100% | 100% | 100% | 100% | 100% | 100% | 99%  | 100% | 100% | 100% | 0%   | 100% | 100% |
| CO_M                                                           | 100% | 100% | 100% | 100% | 100% | 100% | 100% | 100% | 100% | 100% | 100% | 100% | 100% |
| CH4_M                                                          | 100% | 100% | 100% | 100% | 100% | 100% | 100% | 100% | 100% | 100% | 100% | 100% | 100% |
| NOx_M                                                          | 62%  | 77%  | 93%  | 84%  | 99%  | 100% | 89%  | 100% | 100% | 99%  | 100% | 100% | 100% |
| NOxPSS_M                                                       |      |      |      |      |      |      |      |      |      |      |      |      |      |
| HNO3_M                                                         | 93%  | 94%  | 98%  | 75%  | 95%  | 96%  | 96%  | 96%  | 96%  | 97%  | 96%  | 96%  | 98%  |
| HNO4_M                                                         | 0%   | 0%   | 0%   | 0%   | 0%   | 0%   | 0%   | 0%   | 0%   | 0%   | 0%   | 0%   | 0%   |
| PAN_M                                                          | 99%  | 92%  | 100% | 100% | 99%  | 100% | 100% | 100% | 100% | 100% | 83%  | 100% | 100% |
| CH2O_M                                                         | 100% | 82%  | 100% | 100% | 98%  | 100% | 98%  | 98%  | 98%  | 96%  | 0%   | 95%  | 93%  |
| H2O2_M                                                         | 94%  | 94%  | 98%  | 75%  | 95%  | 96%  | 96%  | 96%  | 96%  | 97%  | 96%  | 96%  | 98%  |
| CH3OOH_M                                                       | 43%  | 59%  | 59%  | 59%  | 0%   | 0%   | 0%   | 0%   | 0%   | 69%  | 67%  | 0%   | 0%   |
| Acetone_M                                                      | 96%  | 98%  | 98%  | 88%  | 98%  | 96%  | 98%  | 98%  | 98%  | 97%  | 0%   | 95%  | 93%  |
| Acetald_M                                                      | 96%  | 87%  | 97%  | 88%  | 92%  | 91%  | 94%  | 97%  | 93%  | 89%  | 0%   | 95%  | 92%  |
| C2H6_M                                                         | 26%  | 35%  | 40%  | 40%  | 46%  | 34%  | 31%  | 28%  | 31%  | 29%  | 0%   | 27%  | 31%  |
| C3H8_M                                                         | 96%  | 99%  | 99%  | 94%  | 100% | 97%  | 98%  | 98%  | 98%  | 97%  | 0%   | 96%  | 95%  |
| iC4H10_M                                                       | 96%  | 99%  | 99%  | 94%  | 100% | 97%  | 98%  | 98%  | 98%  | 97%  | 0%   | 96%  | 95%  |
| nC4H10_M                                                       | 96%  | 99%  | 99%  | 94%  | 100% | 97%  | 98%  | 98%  | 98%  | 97%  | 0%   | 96%  | 95%  |
| Alkanes_M                                                      | 26%  | 35%  | 42%  | 43%  | 46%  | 34%  | 33%  | 28%  | 31%  | 29%  | 0%   | 27%  | 31%  |
| C2H4_M                                                         | 26%  | 35%  | 42%  | 43%  | 46%  | 34%  | 33%  | 28%  | 31%  | 29%  | 0%   | 27%  | 31%  |
| Alkenes_M                                                      | 26%  | 35%  | 42%  | 43%  | 46%  | 34%  | 33%  | 28%  | 31%  | 29%  | 0%   | 27%  | 31%  |
| C2H2_M                                                         | 26%  | 35%  | 42%  | 43%  | 46%  | 34%  | 33%  | 28%  | 31%  | 29%  | 0%   | 27%  | 31%  |
| C5H8_M                                                         | 96%  | 99%  | 99%  | 94%  | 100% | 97%  | 98%  | 98%  | 98%  | 97%  | 0%   | 96%  | 95%  |
| Benzene_M                                                      | 96%  | 99%  | 99%  | 94%  | 100% | 97%  | 98%  | 98%  | 98%  | 97%  | 0%   | 96%  | 95%  |
| Toluene_M                                                      | 100% | 100% | 99%  | 95%  | 100% | 100% | 100% | 100% | 100% | 100% | 0%   | 100% | 100% |
| Xylene_M                                                       | 100% | 100% | 99%  | 95%  | 100% | 100% | 100% | 100% | 100% | 100% | 0%   | 100% | 100% |
| MeONO2_M                                                       | 26%  | 35%  | 42%  | 43%  | 46%  | 34%  | 33%  | 28%  | 31%  | 29%  | 0%   | 27%  | 31%  |
| EtONO2_M                                                       | 26%  | 35%  | 42%  | 43%  | 46%  | 34%  | 33%  | 28%  | 31%  | 29%  | 0%   | 27%  | 31%  |
| RONO2_M                                                        | 26%  | 35%  | 42%  | 43%  | 46%  | 34%  | 33%  | 28%  | 31%  | 29%  | 0%   | 27%  | 31%  |
| MeOH_M                                                         | 96%  | 98%  | 98%  | 88%  | 98%  | 96%  | 98%  | 98%  | 98%  | 97%  | 0%   | 95%  | 93%  |
| HCN_M                                                          | 99%  | 100% | 100% | 95%  | 99%  | 100% | 100% | 99%  | 99%  | 100% | 96%  | 100% | 100% |
| CH3CN_M                                                        | 96%  | 98%  | 98%  | 88%  | 98%  | 96%  | 98%  | 98%  | 98%  | 97%  | 0%   | 95%  | 93%  |
| SF6_M                                                          | 76%  | 92%  | 97%  | 95%  | 97%  | 85%  | 90%  | 98%  | 88%  | 85%  | 94%  | 97%  | 94%  |
| S_nuc_M                                                        | 94%  | 99%  | 89%  | 94%  | 96%  | 82%  | 81%  | 96%  | 98%  | 65%  | 85%  | 93%  | 94%  |
| S_atk_M                                                        | 94%  | 99%  | 89%  | 94%  | 96%  | 82%  | 81%  | 96%  | 98%  | 65%  | 85%  | 93%  | 94%  |
| S_acc_M                                                        | 94%  | 99%  | 88%  | 94%  | 96%  | 82%  | 81%  | 95%  | 98%  | 65%  | 85%  | 92%  | 94%  |
| S_crs_M                                                        | 94%  | 99%  | 88%  | 94%  | 96%  | 82%  | 81%  | 95%  | 98%  | 65%  | 85%  | 92%  | 94%  |
| CloudInd_M                                                     | 100% | 100% | 100% | 100% | 100% | 100% | 99%  | 94%  | 100% | 100% | 100% | 100% | 99%  |

| <b>Table S4.</b> ATom, % of records by flag                                                     |           |          |          |          |          |          |          |
|-------------------------------------------------------------------------------------------------|-----------|----------|----------|----------|----------|----------|----------|
| <b>Flags</b>                                                                                    | <b>0*</b> | <b>1</b> | <b>2</b> | <b>3</b> | <b>4</b> | <b>5</b> | <b>6</b> |
| H2O_M                                                                                           | 0.8%      | 99.0%    | 0.0%     | 0.3%     | 0.0%     | 0.0%     | 0.0%     |
| RHw_M                                                                                           | 0.8%      | 99.0%    | 0.0%     | 0.3%     | 0.0%     | 0.0%     | 0.0%     |
| O3_M                                                                                            | 0.8%      | 98.6%    | 0.0%     | 0.3%     | 0.3%     | 0.0%     | 0.0%     |
| CO_M                                                                                            | 0.8%      | 79.4%    | 19.4%    | 0.1%     | 0.5%     | 0.0%     | 0.0%     |
| CH4_M                                                                                           | 0.8%      | 93.5%    | 1.3%     | 1.9%     | 2.5%     | 0.0%     | 0.0%     |
| NOx_M                                                                                           | 0.8%      | 80.8%    | 0.0%     | 8.3%     | 7.6%     | 2.5%     | 0.0%     |
| NOxPSS_M                                                                                        | 0.8%      | 82.4%    | 0.0%     | 11.8%    | 5.1%     | 0.0%     | 0.0%     |
| HNO3_M                                                                                          | 0.8%      | 78.0%    | 0.0%     | 11.6%    | 5.7%     | 3.9%     | 0.0%     |
| HNO4_M                                                                                          | 0.8%      | 28.5%    | 0.0%     | 4.0%     | 8.5%     | 58.3%    | 0.0%     |
| PAN_M                                                                                           | 0.8%      | 58.0%    | 28.4%    | 7.5%     | 5.4%     | 0.0%     | 0.0%     |
| CH2O_M                                                                                          | 0.8%      | 82.9%    | 14.9%    | 0.3%     | 1.1%     | 0.0%     | 0.0%     |
| H2O2_M                                                                                          | 0.8%      | 78.5%    | 0.0%     | 11.6%    | 5.3%     | 3.9%     | 0.0%     |
| CH3OOH_M                                                                                        | 0.8%      | 42.0%    | 0.0%     | 12.0%    | 29.4%    | 15.8%    | 0.0%     |
| Acetone_M                                                                                       | 0.8%      | 31.7%    | 0.0%     | 61.6%    | 6.0%     | 0.0%     | 0.0%     |
| Acetald_M                                                                                       | 0.8%      | 31.4%    | 0.0%     | 60.9%    | 6.9%     | 0.0%     | 0.0%     |
| C2H6_M                                                                                          | 0.8%      | 28.0%    | 0.0%     | 12.4%    | 56.3%    | 0.0%     | 2.5%     |
| C3H8_M                                                                                          | 0.8%      | 28.0%    | 53.1%    | 12.5%    | 5.1%     | 0.0%     | 0.7%     |
| iC4H10_M                                                                                        | 0.8%      | 28.1%    | 54.9%    | 12.5%    | 3.2%     | 0.0%     | 0.5%     |
| nC4H10_M                                                                                        | 0.8%      | 28.1%    | 54.9%    | 12.5%    | 3.2%     | 0.0%     | 0.5%     |
| Alkanes_M                                                                                       | 0.8%      | 28.1%    | 0.0%     | 12.5%    | 56.0%    | 0.0%     | 2.6%     |
| C2H4_M                                                                                          | 0.8%      | 28.1%    | 0.0%     | 12.5%    | 56.0%    | 0.0%     | 2.6%     |
| Alkenes_M                                                                                       | 0.8%      | 28.1%    | 0.0%     | 12.5%    | 56.0%    | 0.0%     | 2.6%     |
| C2H2_M                                                                                          | 0.8%      | 28.0%    | 0.0%     | 12.5%    | 56.2%    | 0.0%     | 2.6%     |
| C5H8_M                                                                                          | 0.8%      | 31.8%    | 2.3%     | 61.7%    | 3.1%     | 0.0%     | 0.5%     |
| Benzene_M                                                                                       | 0.8%      | 31.8%    | 2.3%     | 61.7%    | 3.1%     | 0.0%     | 0.5%     |
| Toluene_M                                                                                       | 0.8%      | 33.0%    | 0.6%     | 64.8%    | 0.6%     | 0.0%     | 0.2%     |
| Xylene_M                                                                                        | 0.8%      | 33.0%    | 0.6%     | 64.8%    | 0.6%     | 0.0%     | 0.2%     |
| MeONO2_M                                                                                        | 0.8%      | 27.4%    | 0.0%     | 12.3%    | 57.0%    | 0.0%     | 2.6%     |
| EtONO2_M                                                                                        | 0.8%      | 26.8%    | 0.0%     | 12.1%    | 57.8%    | 0.0%     | 2.6%     |
| RONO2_M                                                                                         | 0.8%      | 28.1%    | 0.0%     | 12.5%    | 56.0%    | 0.0%     | 2.6%     |
| MeOH_M                                                                                          | 0.8%      | 31.7%    | 0.0%     | 61.5%    | 6.0%     | 0.0%     | 0.0%     |
| HCN_M                                                                                           | 0.8%      | 78.5%    | 8.3%     | 11.6%    | 0.8%     | 0.0%     | 0.0%     |
| CH3CN_M                                                                                         | 0.8%      | 31.7%    | 0.0%     | 61.5%    | 6.0%     | 0.0%     | 0.0%     |
| SF6_M                                                                                           | 0.8%      | 10.4%    | 5.8%     | 79.2%    | 3.8%     | 0.0%     | 0.0%     |
| S_nuc_M                                                                                         | 0.8%      | 84.6%    | 0.0%     | 4.4%     | 10.3%    | 0.0%     | 0.0%     |
| S_atk_M                                                                                         | 0.8%      | 84.6%    | 0.0%     | 4.4%     | 10.3%    | 0.0%     | 0.0%     |
| S_acc_M                                                                                         | 0.8%      | 84.1%    | 0.0%     | 4.6%     | 10.6%    | 0.0%     | 0.0%     |
| S_crs_M                                                                                         | 0.8%      | 84.1%    | 0.0%     | 4.6%     | 10.6%    | 0.0%     | 0.0%     |
| CloudInd_M                                                                                      | 0.8%      | 98.7%    | 0.0%     | 0.2%     | 0.3%     | 0.0%     | 0.0%     |
| * The 0.8% flag=0 corresponds to the short flight RF #46, for which we NaN'd all chemical data. |           |          |          |          |          |          |          |

| <b>Table S5. Test of long-gap interpolation method</b> |             |                               |                     |                     |
|--------------------------------------------------------|-------------|-------------------------------|---------------------|---------------------|
| Species                                                | All parcels | Long-gap interpolated parcels |                     | Short-gap fill      |
| (ppt unless noted)                                     | mean        | bias<br>(% of mean)           | RMSE<br>(% of mean) | RMSE<br>(% of mean) |
| H2O_M (ppm)                                            | 336         |                               |                     | 16%                 |
| RHw_M (%)                                              | 40          |                               |                     | 12%                 |
| O3_M (ppb)                                             | 80          | 3%                            | 12%                 | 6%                  |
| CO_M (ppb)                                             | 80          | 1%                            | 8%                  | 3%                  |
| CH4_M (ppb)                                            | 1850        | <1%                           | <1%                 | <1%                 |
| NOx_M                                                  | 64          | -8%                           | 44%                 | 22%                 |
| NOxPSS_M                                               | 46          | -17%                          | 70%                 | 25%                 |
| HNO3_M                                                 | 162         | -6%                           | 22%                 | 12%                 |
| HNO4_M                                                 | 26          | -7%                           | 54%                 | 28%                 |
| PAN_M                                                  | 87          | 6%                            | 25%                 | 14%                 |
| CH2O_M                                                 | 140         | 6%                            | 22%                 | 11%                 |
| H2O2_M                                                 | 250         | 9%                            | 30%                 | 16%                 |
| CH3OOH_M                                               | 381         | 12%                           | 45%                 | 21%                 |
| Acetone_M                                              | 351         | 3%                            | 18%                 |                     |
| Acetald_M                                              | 56          | 3%                            | 19%                 |                     |
| C2H6_M                                                 | 644         | 2%                            | 16%                 |                     |
| C3H8_M                                                 | 109         | 3%                            | 16%                 |                     |
| iC4H10_M                                               | 11          | 6%                            | 29%                 |                     |
| nC4H10_M                                               | 21          | 5%                            | 29%                 |                     |
| Alkanes_M                                              | 16          | 3%                            | 33%                 |                     |
| C2H4_M                                                 | 6           | 28%                           | 94%                 |                     |
| Alkenes_M                                              | 0.2         | 17%                           | 78%                 |                     |
| C2H2_M                                                 | 97          | 10%                           | 42%                 |                     |
| C5H8_M                                                 | 0.5         | 16%                           | 70%                 |                     |
| Benzene_M                                              | 15          | -12%                          | 33%                 |                     |
| Toluene_M                                              | 1           | 4%                            | 28%                 |                     |
| Xylene_M                                               | 0.1         | 33%                           | 97%                 |                     |
| MeONO2_M                                               | 9           | -11%                          | 29%                 |                     |
| EtONO2_M                                               | 2           | -11%                          | 33%                 |                     |
| RONO2_M                                                | 5           | -5%                           | 37%                 |                     |
| MeOH_M                                                 | 590         | 3%                            | 38%                 |                     |
| HCN_M                                                  | 185         | 5%                            | 31%                 | 10%                 |
| CH3CN_M                                                | 114         | 11%                           | 44%                 |                     |
| SF6_M                                                  | 9           | <1%                           | 1%                  | <1%                 |



471

| <b>Table S6. Test of missing flight data</b>                                                                                                                                                                                                                                                   |             |                     |                                         |
|------------------------------------------------------------------------------------------------------------------------------------------------------------------------------------------------------------------------------------------------------------------------------------------------|-------------|---------------------|-----------------------------------------|
| Missing data                                                                                                                                                                                                                                                                                   | All parcels | Interpolated        | Flights used                            |
| (ppt unless noted)                                                                                                                                                                                                                                                                             | Mean (ppt)  | RMSE<br>(% of mean) |                                         |
| <b><i>ATom-1 RF-5</i></b>                                                                                                                                                                                                                                                                      |             |                     |                                         |
| H2O2_M                                                                                                                                                                                                                                                                                         | 392         | 24%                 | AT-1 RF4, AT-2/3/4 RF-4/5               |
| HNO3_M                                                                                                                                                                                                                                                                                         | 139         | 58%                 | AT-1 RF4, AT-2/3/4 RF-4/5               |
| HNO4_M                                                                                                                                                                                                                                                                                         | 30.2        | 66%                 | AT-1 RF4, AT-2 RF-4/5                   |
| <b><i>ATom-2 RF-2</i></b>                                                                                                                                                                                                                                                                      |             |                     |                                         |
| H2O2_M                                                                                                                                                                                                                                                                                         | 125         | 23%                 | AT-2 RF-3, AT-1/3/4 RF-2/3              |
| HNO3_M                                                                                                                                                                                                                                                                                         | 30.9        | 52%                 | AT-2 RF-3, AT-1/3/4 RF-2/3              |
| HNO4_M                                                                                                                                                                                                                                                                                         | 14.3        | 63%                 | AT-2 RF-3, AT-1 RF-2/3                  |
| <b><i>ATom-3 RF-1</i></b>                                                                                                                                                                                                                                                                      |             |                     |                                         |
| NOx_M                                                                                                                                                                                                                                                                                          | 80.9        | 55%                 | AT-3 RF-2, AT-1/2/4 RF-1/2              |
| <b><i>ATom-3/4 all</i></b>                                                                                                                                                                                                                                                                     |             |                     |                                         |
| HNO4_M                                                                                                                                                                                                                                                                                         | 26.1        | 105%                | AT-1/2 all                              |
| <b><i>ATom-4 RF-5/6/7/8/9/12/13</i></b>                                                                                                                                                                                                                                                        |             |                     |                                         |
| CH3OOH_M                                                                                                                                                                                                                                                                                       | 336         | 72%                 | AT-1/2 RF-5:11, AT-3 RF-5:13, AT-4 RF-4 |
| Notes: Missing flight data are filled using a multiple linear regression from other flights based on the explanatory variables: pressure, noontime solar zenith angle, and latitude (in that order). RMSE is calculated from the residuals of this fit for the flights used in the regression. |             |                     |                                         |

472

473

| <b>Table S7. Chemistry models</b>                                                                                                                                                                                                                                                                                   |      |            |      |                             |                      |                                           |                             |
|---------------------------------------------------------------------------------------------------------------------------------------------------------------------------------------------------------------------------------------------------------------------------------------------------------------------|------|------------|------|-----------------------------|----------------------|-------------------------------------------|-----------------------------|
| Used in                                                                                                                                                                                                                                                                                                             | ID   | Model name | Type | Meteorology                 | Model Grid           | References                                | Point of Contact            |
| clim                                                                                                                                                                                                                                                                                                                | GFDL | GFDL-AM3   | CCM  | NCEP (nudged)               | C180 x L48           | Horowitz et al., 2003; Li et al. 2017     | amfiore @Ideo. columbia.edu |
| clim, MDS-0                                                                                                                                                                                                                                                                                                         | GISS | GISS-E2.1  | CCM  | Daily SSTs, nudged to MERRA | 2° x 2.5° x 40L      | Rienecker et al.,                         | lee.murray @rochester.edu   |
| clim, MDS-0                                                                                                                                                                                                                                                                                                         | GMI  | GMI-CTM    | CTM  | MERRA                       | 1° x 1.25° x 72L     | Strahan et al., 2013; Duncan et al., 2007 | Sarah.A.Strode @nasa.gov    |
| clim, MDS-0                                                                                                                                                                                                                                                                                                         | GC   | GEOS-Chem  | CTM  | MERRA-2                     | 2° x 2.5° x 72L      | Gelaro et al., 2017                       | lee.murray @rochester.edu   |
| clim, MDS-0                                                                                                                                                                                                                                                                                                         | NCAR | CAM4-Chem  | CCM  | Nudged to MERRA             | 0.47° x 0.625° x 52L | Tilmes et al., 2016                       | emmons @ucar.edu            |
| clim, MDS-0 & 2b                                                                                                                                                                                                                                                                                                    | UCI  | UCI-CTM    | CTM  | ECMWF IFS Cy38r1            | T159N80 x L60        | Holmes et al., 2017; Prather 2015         | mprather @uci.edu           |
| MDS-0                                                                                                                                                                                                                                                                                                               | F0AM | F0AM       | box  | MDS+scaled ATom Js          | N/A                  | Wolfe et al., 2016                        | glenn.m.wolfe @nasa.gov     |
| The descriptions of models used in the paper. The first column denotes if the model's August climatology is used ('clim') and also the MDS versions used. F0AM used chemical mechanism MCMv331 plus J-HNO <sub>4</sub> plus O( <sup>1</sup> D)+CH <sub>4</sub> . For the global models see P2017, P2017, and H2018. |      |            |      |                             |                      |                                           |                             |

474

475

476

477

| <b>Table S8.</b> Reactivity statistics and mean J-values for 3 large domains (Global, Pacific, Atlantic) |          |                    |      |      |      |      |      |      |      |        |
|----------------------------------------------------------------------------------------------------------|----------|--------------------|------|------|------|------|------|------|------|--------|
| <b>Table S8a.</b> Average Reactivity: mean, median, mean of top 10 %                                     |          |                    |      |      |      |      |      |      |      |        |
|                                                                                                          |          | Models using MDS-0 |      |      |      |      |      |      |      | MDS-2b |
| Value                                                                                                    | Region   | F0AM               | GC   | GISS | GMI  | NCAR | UCI  | U15  | U97  | UCIZ*  |
| P-O3, mean, ppb/d                                                                                        |          |                    |      |      |      |      |      |      |      |        |
|                                                                                                          | Global   | 2.12               | 2.12 | 2.57 | 2.08 | 2.22 | 2.38 | 2.37 | 2.37 | 1.23   |
|                                                                                                          | Pacific  | 1.96               | 2.00 | 1.99 | 1.96 | 2.01 | 2.17 | 2.13 | 2.15 | 1.11   |
|                                                                                                          | Atlantic | 1.96               | 2.12 | 3.49 | 2.20 | 2.44 | 2.48 | 2.48 | 2.49 | 1.25   |
| P-O3, median, ppb/d                                                                                      |          |                    |      |      |      |      |      |      |      |        |
|                                                                                                          | Global   | 1.50               | 1.69 | 1.96 | 1.64 | 1.80 | 1.81 | 1.80 | 1.80 | 0.96   |
|                                                                                                          | Pacific  | 1.36               | 1.67 | 1.62 | 1.52 | 1.67 | 1.73 | 1.69 | 1.71 | 0.94   |
|                                                                                                          | Atlantic | 1.83               | 1.97 | 3.34 | 2.09 | 2.31 | 2.18 | 2.18 | 2.19 | 1.10   |
| P-O3, mean of top 10%, ppb/d                                                                             |          |                    |      |      |      |      |      |      |      |        |
|                                                                                                          | Global   | 7.48               | 6.75 | 7.98 | 6.60 | 6.72 | 8.07 | 8.07 | 8.06 | 4.06   |
|                                                                                                          | Pacific  | 6.65               | 5.53 | 5.55 | 5.68 | 5.69 | 6.54 | 6.29 | 6.37 | 3.03   |
|                                                                                                          | Atlantic | 4.73               | 5.32 | 8.23 | 5.63 | 5.88 | 6.74 | 6.76 | 6.84 | 3.38   |
| L-O3, mean, ppb/d                                                                                        |          |                    |      |      |      |      |      |      |      |        |
|                                                                                                          | Global   | 1.81               | 1.63 | 1.93 | 1.70 | 1.76 | 1.76 | 1.74 | 1.75 | 1.61   |
|                                                                                                          | Pacific  | 1.65               | 1.51 | 1.79 | 1.55 | 1.52 | 1.58 | 1.53 | 1.56 | 1.42   |
|                                                                                                          | Atlantic | 2.15               | 2.02 | 2.37 | 2.17 | 2.47 | 2.28 | 2.28 | 2.30 | 2.12   |
| L-O3, median, ppb/d                                                                                      |          |                    |      |      |      |      |      |      |      |        |
|                                                                                                          | Global   | 1.03               | 0.98 | 1.23 | 0.97 | 1.08 | 1.03 | 1.03 | 1.02 | 0.94   |
|                                                                                                          | Pacific  | 1.09               | 1.06 | 1.31 | 1.08 | 1.10 | 1.10 | 1.14 | 1.11 | 1.02   |
|                                                                                                          | Atlantic | 1.27               | 1.20 | 1.44 | 1.23 | 1.60 | 1.29 | 1.29 | 1.29 | 1.18   |
| L-O3, mean of top 10%, ppb/d                                                                             |          |                    |      |      |      |      |      |      |      |        |
|                                                                                                          | Global   | 6.27               | 5.70 | 6.39 | 5.97 | 6.36 | 6.31 | 6.32 | 6.33 | 5.79   |
|                                                                                                          | Pacific  | 5.48               | 4.78 | 5.22 | 4.93 | 4.77 | 5.01 | 4.83 | 4.96 | 4.53   |
|                                                                                                          | Atlantic | 6.05               | 6.05 | 6.80 | 6.40 | 8.36 | 6.85 | 6.88 | 6.93 | 6.12   |
| L-CH4, mean, ppb/d                                                                                       |          |                    |      |      |      |      |      |      |      |        |
|                                                                                                          | Global   | 0.81               | 0.76 | 0.43 | 0.75 | 0.73 | 0.79 | 0.78 | 0.78 | 0.61   |
|                                                                                                          | Pacific  | 0.85               | 0.82 | 0.40 | 0.80 | 0.79 | 0.82 | 0.80 | 0.81 | 0.63   |
|                                                                                                          | Atlantic | 0.80               | 0.78 | 0.51 | 0.81 | 0.86 | 0.85 | 0.85 | 0.85 | 0.69   |
| L-CH4, median, ppb/d                                                                                     |          |                    |      |      |      |      |      |      |      |        |
|                                                                                                          | Global   | 0.46               | 0.50 | 0.37 | 0.45 | 0.47 | 0.48 | 0.48 | 0.48 | 0.40   |
|                                                                                                          | Pacific  | 0.52               | 0.61 | 0.36 | 0.56 | 0.53 | 0.59 | 0.59 | 0.60 | 0.50   |
|                                                                                                          | Atlantic | 0.53               | 0.57 | 0.51 | 0.54 | 0.66 | 0.58 | 0.57 | 0.56 | 0.48   |
| L-CH4, mean of top 10%, ppb/d                                                                            |          |                    |      |      |      |      |      |      |      |        |
|                                                                                                          | Global   | 2.67               | 2.27 | 1.14 | 2.31 | 2.24 | 2.51 | 2.49 | 2.51 | 1.83   |
|                                                                                                          | Pacific  | 2.71               | 2.29 | 1.02 | 2.34 | 2.24 | 2.41 | 2.32 | 2.37 | 1.71   |
|                                                                                                          | Atlantic | 2.15               | 1.95 | 1.08 | 2.09 | 2.32 | 2.26 | 2.25 | 2.30 | 1.74   |

478  
479  
480

| <b>Table S8b. Percent of total Reactivity in the top 50 %, top 10 %, top 3 % of parcels</b> |          |                    |     |      |     |      |     |     |     |        |
|---------------------------------------------------------------------------------------------|----------|--------------------|-----|------|-----|------|-----|-----|-----|--------|
|                                                                                             |          | Models using MDS-0 |     |      |     |      |     |     |     | MDS-2b |
| Value                                                                                       | Region   | F0AM               | GC  | GISS | GMI | NCAR | UCI | U15 | U97 | UCIZ*  |
| P-O3, % of total R in top 50%                                                               |          |                    |     |      |     |      |     |     |     |        |
|                                                                                             | Global   | 83%                | 82% | 82%  | 83% | 82%  | 83% | 83% | 83% | 84%    |
|                                                                                             | Pacific  | 84%                | 80% | 77%  | 81% | 80%  | 81% | 81% | 81% | 80%    |
|                                                                                             | Atlantic | 76%                | 79% | 76%  | 78% | 77%  | 79% | 79% | 79% | 83%    |
| P-O3, %of total R in top 10%                                                                |          |                    |     |      |     |      |     |     |     |        |
|                                                                                             | Global   | 35%                | 32% | 31%  | 32% | 30%  | 34% | 34% | 34% | 33%    |
|                                                                                             | Pacific  | 34%                | 28% | 28%  | 29% | 29%  | 30% | 30% | 30% | 27%    |
|                                                                                             | Atlantic | 24%                | 25% | 24%  | 26% | 24%  | 27% | 27% | 28% | 27%    |
| P-O3, %of total R in top 3%                                                                 |          |                    |     |      |     |      |     |     |     |        |
|                                                                                             | Global   | 16%                | 11% | 12%  | 12% | 12%  | 13% | 12% | 13% | 12%    |
|                                                                                             | Pacific  | 10%                | 10% | 9%   | 10% | 9%   | 12% | 12% | 12% | 10%    |
|                                                                                             | Atlantic | 14%                | 13% | 13%  | 13% | 16%  | 14% | 14% | 14% | 14%    |
| L-O3, % of total R in top 50%                                                               |          |                    |     |      |     |      |     |     |     |        |
|                                                                                             | Global   | 88%                | 88% | 86%  | 88% | 87%  | 88% | 88% | 88% | 88%    |
|                                                                                             | Pacific  | 88%                | 86% | 85%  | 86% | 85%  | 86% | 85% | 86% | 85%    |
|                                                                                             | Atlantic | 87%                | 87% | 86%  | 88% | 87%  | 88% | 88% | 88% | 88%    |
| L-O3, %of total R in top 10%                                                                |          |                    |     |      |     |      |     |     |     |        |
|                                                                                             | Global   | 35%                | 35% | 33%  | 35% | 36%  | 36% | 36% | 36% | 36%    |
|                                                                                             | Pacific  | 33%                | 32% | 29%  | 32% | 31%  | 32% | 32% | 32% | 32%    |
|                                                                                             | Atlantic | 28%                | 30% | 29%  | 30% | 34%  | 30% | 30% | 30% | 29%    |
| L-O3, %of total R in top 3%                                                                 |          |                    |     |      |     |      |     |     |     |        |
|                                                                                             | Global   | 14%                | 13% | 13%  | 13% | 16%  | 14% | 14% | 14% | 14%    |
|                                                                                             | Pacific  | 14%                | 13% | 12%  | 13% | 13%  | 13% | 13% | 13% | 14%    |
|                                                                                             | Atlantic | 10%                | 11% | 11%  | 10% | 16%  | 11% | 11% | 11% | 11%    |
| L-CH4, % of total R in top 50%                                                              |          |                    |     |      |     |      |     |     |     |        |
|                                                                                             | Global   | 89%                | 88% | 80%  | 89% | 87%  | 89% | 89% | 89% | 87%    |
|                                                                                             | Pacific  | 89%                | 87% | 78%  | 88% | 86%  | 87% | 87% | 87% | 84%    |
|                                                                                             | Atlantic | 85%                | 84% | 74%  | 86% | 84%  | 86% | 86% | 86% | 85%    |
| L-CH4, %of total R in top 10%                                                               |          |                    |     |      |     |      |     |     |     |        |
|                                                                                             | Global   | 33%                | 30% | 27%  | 31% | 31%  | 32% | 32% | 32% | 30%    |
|                                                                                             | Pacific  | 32%                | 28% | 26%  | 29% | 29%  | 29% | 29% | 29% | 27%    |
|                                                                                             | Atlantic | 27%                | 25% | 21%  | 26% | 27%  | 27% | 27% | 27% | 25%    |
| L-CH4, %of total R in top 3%                                                                |          |                    |     |      |     |      |     |     |     |        |
|                                                                                             | Global   | 14%                | 11% | 11%  | 11% | 11%  | 12% | 12% | 12% | 11%    |
|                                                                                             | Pacific  | 14%                | 10% | 10%  | 11% | 10%  | 12% | 11% | 12% | 10%    |
|                                                                                             | Atlantic | 10%                | 8%  | 7%   | 9%  | 10%  | 10% | 9%  | 10% | 9%     |

484

| <b>Table S8c. Mean J-values</b> |          |        |      |      |      |      |      |      |      |      |
|---------------------------------|----------|--------|------|------|------|------|------|------|------|------|
|                                 |          | models |      |      |      |      |      |      |      |      |
| Value                           | Region   | F0AM   | GC   | GISS | GMI  | NCAR | UCI  | U15  | U97  | UCIZ |
| J-O1D, mean, e-5 /s             |          |        |      |      |      |      |      |      |      |      |
|                                 | Global   | 1.29   | 1.12 | 1.64 | 1.20 | 1.29 | 1.17 | 1.17 | 1.17 | 1.16 |
|                                 | Pacific  | 1.38   | 1.26 | 1.85 | 1.33 | 1.38 | 1.30 | 1.29 | 1.30 | 1.30 |
|                                 | Atlantic | 1.32   | 1.17 | 1.61 | 1.26 | 1.46 | 1.26 | 1.26 | 1.27 | 1.25 |
| J-NO2, mean, e-3 /s             |          |        |      |      |      |      |      |      |      |      |
|                                 | Global   | 4.55   | 4.33 | 5.36 | 4.30 | 4.51 | 4.75 | 4.72 | 4.73 | 4.66 |
|                                 | Pacific  | 4.50   | 4.43 | 5.47 | 4.38 | 4.60 | 4.86 | 4.79 | 4.84 | 4.82 |
|                                 | Atlantic | 4.54   | 4.39 | 5.15 | 4.37 | 4.59 | 4.91 | 4.90 | 4.93 | 4.77 |

485

486

487

488

489

490

491

492

493

494

Global includes all ATom-1 parcels, Pacific considers all measurements over the Pacific Ocean from 53°S to 60°N, and Atlantic uses parcels from 53° S to 60° N over the Atlantic Ocean. All parcels are weighted inversely by the number of parcels in each 10° latitude by 100 hPa bin, and by cosine(latitude). Results from MDS-0 are shown because we have results from six models. Results from the updated MDS-2b are shown (UCIZ\*) using the using the current UCI CTM model UCIZ and the RDS\* protocol that preprocesses the MDS-2b initializations with a 24 h decay of HNO<sub>4</sub> and PAN according to their local thermal decomposition frequencies, see text.

495

| <b>Table S9.</b> Standard deviation across 5 separated days in August<br>(% of mean reactivity or J-value) using MDS-0. |      |      |       |       |       |
|-------------------------------------------------------------------------------------------------------------------------|------|------|-------|-------|-------|
|                                                                                                                         | P-O3 | L-O3 | L-CH4 | J-O1D | J-NO2 |
| GC                                                                                                                      | 11%  | 9%   | 10%   | 9%    | 9%    |
| GISS                                                                                                                    | 22%  | 14%  | 17%   | 14%   | 12%   |
| GMI                                                                                                                     | 10%  | 9%   | 10%   | 10%   | 10%   |
| NCAR                                                                                                                    | 23%  | 32%  | 28%   | 17%   | 16%   |
| UCI                                                                                                                     | 10%  | 10%  | 11%   | 10%   | 11%   |

496

497

## SI References

- Duncan, B.N., Logan, J.A., Bey, I., Megretskaya, I.A., Yantosca, R.M., Novelli, P.C., Jones, N.B. and Rinsland, C.P., 2007. Global budget of CO, 1988–1997: Source estimates and validation with a global model. *Journal of Geophysical Research: Atmospheres*, 112(D22).
- Gelaro, R., McCarty, W., Suárez, M.J., Todling, R., Molod, A., Takacs, L., Randles, C.A., Darmenov, A., Bosilovich, M.G., Reichle, R. and Wargan, K., 2017. The modern-era retrospective analysis for research and applications, version 2 (MERRA-2). *Journal of climate*, 30(14), pp.5419-5454.
- Holmes, C.D. and Prather, M.J., 2017. An atmospheric definition of the equator and its implications for atmospheric chemistry and climate. *Nature Geoscience*.
- Horowitz, L.W., Walters, S., Mauzerall, D.L., Emmons, L.K., Rasch, P.J., Granier, C., Tie, X., Lamarque, J.F., Schultz, M.G., Tyndall, G.S. and Orlando, J.J., 2003. A global simulation of tropospheric ozone and related tracers: Description and evaluation of MOZART, version 2. *Journal of geophysical research: Atmospheres*, 108(D24).
- Li, D., Zhang, R. and Knutson, T.R., 2017. On the discrepancy between observed and CMIP5 multi-model simulated Barents Sea winter sea ice decline. *Nature Communications*, 8(1), pp.1-7.
- Prather, M.J., Zhu, X., Flynn, C.M., Strode, S.A., Rodriguez, J.M., Steenrod, S.D., Liu, J., Lamarque, J.F., Fiore, A.M., Horowitz, L.W. and Mao, J., 2017. Global atmospheric chemistry— which air matters. *Atmospheric Chemistry and Physics*, 17(14), pp.9081-9102.
- Prather, M.J., Flynn, C.M., Zhu, X., Steenrod, S.D., Strode, S.A., Fiore, A.M., Correa, G., Murray, L.T. and Lamarque, J.F., 2018. How well can global chemistry models calculate the reactivity of short-lived greenhouse gases in the remote troposphere, knowing the chemical composition. *Atmospheric Measurement Techniques*, 11(5), pp.2653-2668.
- Rienecker, M.M., Suarez, M.J., Gelaro, R., Todling, R., Bacmeister, J., Liu, E., Bosilovich, M.G., Schubert, S.D., Takacs, L., Kim, G.K. and Bloom, S., 2011. MERRA: NASA's modern-era retrospective analysis for research and applications. *Journal of climate*, 24(14), pp.3624-3648.
- Strahan, S.E., Douglass, A.R. and Steenrod, S.D., 2016. Chemical and dynamical impacts of stratospheric sudden warmings on Arctic ozone variability. *Journal of Geophysical Research: Atmospheres*, 121(19), pp.11-836.
- Tilmes, S., Sanderson, B.M. and O'Neill, B.C., 2016. Climate impacts of geoengineering in a delayed mitigation scenario. *Geophysical Research Letters*, 43(15), pp.8222-8229.
- Wofsy, S.C., Afshar, S., Allen, H.M., Apel, E.C., Asher, E.C., Barletta, B., Bent, J., Bian, H., Biggs, B.C., Blake, D.R. and Blake, N., 2018. ATom: Merged atmospheric chemistry, trace gases, and aerosols. ORNL DAAC Oak Ridge, Tennessee, USA.
- Wolfe, G.M., Marvin, M.R., Roberts, S.J., Travis, K.R. and Liao, J., 2016. The framework for 0-D atmospheric modeling (F0AM) v3. 1. *Geoscientific Model Development*, 9(9), pp.3309-3319.
